# Supplementary material
Source: PubMed Central journal article supplement (PMC4830270)
Supplement: NIHMS770692-supplement.pdf [file NIHMS770692-supplement.pdf]

## **SUPPLEMENT**

Representative references are included to clarify the basis for Task Force recommendations. This list is not exhaustive and preference has been given to previously published evidence based reviews and clinical practice guidelines (e.g., from ASBMT, NCCN, CIBMTR, and EBMT). The bibliographic list focuses on papers published in the year 2000 and later. However, seminal studies published prior to 2000 are included for some diseases (e.g., rare indications).

## TABLE OF CONTENTS

| Indication                                                                                                         | Page Number |
|--------------------------------------------------------------------------------------------------------------------|-------------|
| Acute myeloid leukemia                                                                                             | 3           |
| Acute lymphoblastic leukemia                                                                                       | 6           |
| Acute promyelocytic leukemia                                                                                       | 9           |
| Myelodysplastic syndromes                                                                                          | 10          |
| Myelofibrosis and myeloproliferative diseases                                                                      | 11          |
| Chronic myeloid leukemia                                                                                           | 12          |
| Diffuse large B-cell lymphoma                                                                                      | 14          |
| Follicular lymphoma                                                                                                | 16          |
| T-cell lymphoma                                                                                                    | 18          |
| Mantle cell lymphoma                                                                                               | 20          |
| Hodgkin lymphoma                                                                                                   | 21          |
| Plasmablastic lymphoma                                                                                             | 24          |
| Burkitt's lymphoma                                                                                                 | 25          |
| Lymphoplasmacytic lymphoma                                                                                         | 26          |
| Plasma cell disorders                                                                                              | 27          |
| Chronic lymphocytic leukemia and pro-lymphocytic leukemia                                                          | 29          |
| Germ cell tumors                                                                                                   | 30          |
| Solid tumors (other than germ cell tumors)                                                                         | 31          |
| Severe aplastic anemia                                                                                             | 34          |
| Sickle cell disease                                                                                                | 36          |
| Thalassemia                                                                                                        | 38          |
| Fanconi anemia, dyskeratosis congenital, Diamond Blackfan anemia and other inherited bone marrow failure syndromes | 40          |
| Severe congenital neutropenia, chronic granulomatous disease and other phagocytic cell disorders                   | 42          |
| Hemophagocytic disorders                                                                                           | 44          |
| Adrenoleukodystrophy, Krabbe's disease and related disorders                                                       | 46          |
| Inborn errors                                                                                                      | 48          |
| Primary immunodeficiency disorders, Wiskott Aldrich syndrome, severe combined immunodeficiency and its variants    | 51          |
| Osteopetrosis                                                                                                      | 55          |
| Multiple sclerosis                                                                                                 | 56          |
| Autoimmune diseases                                                                                                | 58          |

## Acute myeloid leukemia

1. Oliansky DM, Appelbaum F, Cassileth PA, et al. The role of cytotoxic therapy with hematopoietic stem cell transplantation in the therapy of acute myelogenous leukemia in adults: an evidence-based review. *Biology of blood and marrow transplantation : journal of the American Society for Blood and Marrow Transplantation*. 2008;14:137-180.
2. Oliansky DM, Rizzo JD, Aplan PD, et al. The role of cytotoxic therapy with hematopoietic stem cell transplantation in the therapy of acute myeloid leukemia in children: an evidence-based review. *Biology of blood and marrow transplantation : journal of the American Society for Blood and Marrow Transplantation*. 2007;13:1-25.
3. NCCN clinical practice guidelines in oncology (NCCN guidelines). Acute myeloid leukemia. Version 1.2015. Available at [www.nccn.org](http://www.nccn.org) (accessed 02/01/2015).
4. Dohner H, Estey EH, Amadori S, et al. Diagnosis and management of acute myeloid leukemia in adults: recommendations from an international expert panel, on behalf of the European LeukemiaNet. *Blood*. 2010;115:453-474.
5. Creutzig U, van den Heuvel-Eibrink MM, Gibson B, et al. Diagnosis and management of acute myeloid leukemia in children and adolescents: recommendations from an international expert panel. *Blood*. 2012;120:3187-3205.
6. Koreth J, Schlenk R, Kopecky KJ, et al. Allogeneic stem cell transplantation for acute myeloid leukemia in first complete remission: systematic review and meta-analysis of prospective clinical trials. *Jama*. 2009;301:2349-2361.
7. Ratko TA, Belinson SE, Brown HM, et al. Hematopoietic Stem-Cell Transplantation in the Pediatric Population. Comparative Effectiveness Review No. 48. (Prepared by the Blue Cross and Blue Shield Association Technology Evaluation Center Evidence-based Practice Center under Contract No. HHS 290-2007-10058.) AHRQ Publication No. 12-EHC018-EF. Rockville, MD: Agency for Healthcare Research and Quality; February 2012. Available at [www.effectivehealthcare.ahrq.gov/reports/final.cfm](http://www.effectivehealthcare.ahrq.gov/reports/final.cfm) (accessed 02/01/2015).
8. Kurosawa S, Yamaguchi T, Miyawaki S, et al. A Markov decision analysis of allogeneic hematopoietic cell transplantation versus chemotherapy in patients with acute myeloid leukemia in first remission. *Blood*. 2011;117:2113-2120.
9. Bleakley M, Lau L, Shaw PJ, Kaufman A. Bone marrow transplantation for paediatric AML in first remission: a systematic review and meta-analysis. *Bone marrow transplantation*. 2002;29:843-852.
10. Herr AL, Labopin M, Blaise D, et al. HLA-identical sibling allogeneic peripheral blood stem cell transplantation with reduced intensity conditioning compared to autologous peripheral blood stem cell transplantation for elderly patients with de novo acute myeloid leukemia. *Leukemia*. 2007;21:129-135.
11. Estey E, de Lima M, Tibes R, et al. Prospective feasibility analysis of reduced-intensity conditioning (RIC) regimens for hematopoietic stem cell transplantation (HSCT) in elderly patients with acute myeloid leukemia (AML) and high-risk myelodysplastic syndrome (MDS). *Blood*. 2007;109:1395-1400.
12. Burnett AK, Wheatley K, Goldstone AH, et al. The value of allogeneic bone marrow transplant in patients with acute myeloid leukaemia at differing risk of relapse: results of the UK MRC AML 10 trial. *British journal of haematology*. 2002;118:385-400.
13. Suci S, Mandelli F, de Witte T, et al. Allogeneic compared with autologous stem cell transplantation in the treatment of patients younger than 46 years with acute myeloid leukemia (AML) in first complete remission (CR1): an intention-to-treat analysis of the EORTC/GIMEMAAML-10 trial. *Blood*. 2003;102:1232-1240.
14. Kurosawa S, Yamaguchi T, Uchida N, et al. Comparison of allogeneic hematopoietic cell transplantation and chemotherapy in elderly patients with non-M3 acute myelogenous

- leukemia in first complete remission. *Biology of blood and marrow transplantation : journal of the American Society for Blood and Marrow Transplantation*. 2011;17:401-411.
15. Farag SS, Maharry K, Zhang MJ, et al. Comparison of reduced-intensity hematopoietic cell transplantation with chemotherapy in patients age 60-70 years with acute myelogenous leukemia in first remission. *Biology of blood and marrow transplantation : journal of the American Society for Blood and Marrow Transplantation*. 2011;17:1796-1803.
  16. McClune BL, Weisdorf DJ, Pedersen TL, et al. Effect of age on outcome of reduced-intensity hematopoietic cell transplantation for older patients with acute myeloid leukemia in first complete remission or with myelodysplastic syndrome. *Journal of clinical oncology : official journal of the American Society of Clinical Oncology*. 2010;28:1878-1887.
  17. Woods WG, Neudorf S, Gold S, et al. A comparison of allogeneic bone marrow transplantation, autologous bone marrow transplantation, and aggressive chemotherapy in children with acute myeloid leukemia in remission. *Blood*. 2001;97:56-62.
  18. Duval M, Klein JP, He W, et al. Hematopoietic stem-cell transplantation for acute leukemia in relapse or primary induction failure. *Journal of clinical oncology : official journal of the American Society of Clinical Oncology*. 2010;28:3730-3738.
  19. Hasle H. A critical review of which children with acute myeloid leukaemia need stem cell procedures. *British journal of haematology*. 2014;166:23-33.
  20. Burke MJ, Wagner JE, Cao Q, Ustun C, Verneris MR. Allogeneic hematopoietic cell transplantation in first remission abrogates poor outcomes associated with high-risk pediatric acute myeloid leukemia. *Biology of blood and marrow transplantation : journal of the American Society for Blood and Marrow Transplantation*. 2013;19:1021-1025.
  21. Weisdorf D, Eapen M, Ruggeri A, et al. Alternative donor transplantation for older patients with acute myeloid leukemia in first complete remission: a center for international blood and marrow transplant research-eurocord analysis. *Biology of blood and marrow transplantation : journal of the American Society for Blood and Marrow Transplantation*. 2014;20:816-822.
  22. Eapen M, Rubinstein P, Zhang MJ, et al. Outcomes of transplantation of unrelated donor umbilical cord blood and bone marrow in children with acute leukaemia: a comparison study. *Lancet*. 2007;369:1947-1954.
  23. Saber W, Opie S, Rizzo JD, Zhang MJ, Horowitz MM, Schriber J. Outcomes after matched unrelated donor versus identical sibling hematopoietic cell transplantation in adults with acute myelogenous leukemia. *Blood*. 2012;119:3908-3916.
  24. Eapen M, Rubinstein P, Zhang MJ, et al. Comparable long-term survival after unrelated and HLA-matched sibling donor hematopoietic stem cell transplantations for acute leukemia in children younger than 18 months. *Journal of clinical oncology : official journal of the American Society of Clinical Oncology*. 2006;24:145-151.
  25. Laughlin MJ, Eapen M, Rubinstein P, et al. Outcomes after transplantation of cord blood or bone marrow from unrelated donors in adults with leukemia. *The New England journal of medicine*. 2004;351:2265-2275.
  26. Rocha V, Labopin M, Sanz G, et al. Transplants of umbilical-cord blood or bone marrow from unrelated donors in adults with acute leukemia. *The New England journal of medicine*. 2004;351:2276-2285.
  27. Schetelig J, Bornhauser M, Schmid C, et al. Matched unrelated or matched sibling donors result in comparable survival after allogeneic stem-cell transplantation in elderly patients with acute myeloid leukemia: a report from the cooperative German Transplant Study Group. *Journal of clinical oncology : official journal of the American Society of Clinical Oncology*. 2008;26:5183-5191.

28. Gupta V, Tallman MS, He W, et al. Comparable survival after HLA-well-matched unrelated or matched sibling donor transplantation for acute myeloid leukemia in first remission with unfavorable cytogenetics at diagnosis. *Blood*. 2010;116:1839-1848.
29. Valcarcel D, Sierra J, Wang T, et al. One-antigen mismatched related versus HLA-matched unrelated donor hematopoietic stem cell transplantation in adults with acute leukemia: Center for International Blood and Marrow Transplant Research results in the era of molecular HLA typing. *Biology of blood and marrow transplantation : journal of the American Society for Blood and Marrow Transplantation*. 2011;17:640-648.
30. Luo Y, Xiao H, Lai X, et al. T-cell-replete haploidentical HSCT with low-dose anti-T-lymphocyte globulin compared with matched sibling HSCT and unrelated HSCT. *Blood*. 2014;124:2735-2743.
31. Wang Y, Liu QF, Xu LP, et al. Haploidentical vs identical-sibling transplant for AML in remission: a multicenter, prospective study. *Blood*. 2015;125:3956-3962.
32. Walter RB, Pagel JM, Gooley TA, et al. Comparison of matched unrelated and matched related donor myeloablative hematopoietic cell transplantation for adults with acute myeloid leukemia in first remission. *Leukemia*. 2010;24:1276-1282.

## Acute lymphoblastic leukemia

1. Oliansky DM, Camitta B, Gaynon P, et al. The role of cytotoxic therapy with hematopoietic stem cell transplantation in the treatment of pediatric acute lymphoblastic leukemia: update of the 2005 evidence-based review. ASBMT Position Statement. *Biology of blood and marrow transplantation : journal of the American Society for Blood and Marrow Transplantation*. 2012;18:979-981.
2. Oliansky DM, Camitta B, Gaynon P, et al. Role of cytotoxic therapy with hematopoietic stem cell transplantation in the treatment of pediatric acute lymphoblastic leukemia: update of the 2005 evidence-based review. *Biology of blood and marrow transplantation : journal of the American Society for Blood and Marrow Transplantation*. 2012;18:505-522.
3. Oliansky DM, Larson RA, Weisdorf D, et al. The role of cytotoxic therapy with hematopoietic stem cell transplantation in the treatment of adult acute lymphoblastic leukemia: update of the 2006 evidence-based review. *Biology of blood and marrow transplantation : journal of the American Society for Blood and Marrow Transplantation*. 2012;18:16-17.
4. Oliansky DM, Larson RA, Weisdorf D, et al. The role of cytotoxic therapy with hematopoietic stem cell transplantation in the treatment of adult acute lymphoblastic leukemia: update of the 2006 evidence-based review. *Biology of blood and marrow transplantation : journal of the American Society for Blood and Marrow Transplantation*. 2012;18:18-36 e16.
5. NCCN clinical practice guidelines in oncology (NCCN guidelines). Acute lymphoblastic leukemia. Version 2.2014. Available at [www.nccn.org](http://www.nccn.org) (accessed 02/01/2015).
6. Hitzler JK, He W, Doyle J, et al. Outcome of transplantation for acute lymphoblastic leukemia in children with Down syndrome. *Pediatr Blood Cancer*. 2014;61:1126-1128.
7. Marks DI, Woo KA, Zhong X, et al. Unrelated umbilical cord blood transplant for adult acute lymphoblastic leukemia in first and second complete remission: a comparison with allografts from adult unrelated donors. *Haematologica*. 2014;99:322-328.
8. Tracey J, Zhang MJ, Thiel E, Sobocinski KA, Eapen M. Transplantation conditioning regimens and outcomes after allogeneic hematopoietic cell transplantation in children and adolescents with acute lymphoblastic leukemia. *Biology of blood and marrow transplantation : journal of the American Society for Blood and Marrow Transplantation*. 2013;19:255-259.
9. Zhang MJ, Davies SM, Camitta BM, et al. Comparison of outcomes after HLA-matched sibling and unrelated donor transplantation for children with high-risk acute lymphoblastic leukemia. *Biology of blood and marrow transplantation : journal of the American Society for Blood and Marrow Transplantation*. 2012;18:1204-1210.
10. Nemecek ER, Ellis K, He W, et al. Outcome of myeloablative conditioning and unrelated donor hematopoietic cell transplantation for childhood acute lymphoblastic leukemia in third remission. *Biology of blood and marrow transplantation : journal of the American Society for Blood and Marrow Transplantation*. 2011;17:1833-1840.
11. Verneris MR, Eapen M, Duerst R, et al. Reduced-intensity conditioning regimens for allogeneic transplantation in children with acute lymphoblastic leukemia. *Biology of blood and marrow transplantation : journal of the American Society for Blood and Marrow Transplantation*. 2010;16:1237-1244.
12. Eapen M, Zhang MJ, Devidas M, et al. Outcomes after HLA-matched sibling transplantation or chemotherapy in children with acute lymphoblastic leukemia in a second remission after an isolated central nervous system relapse: a collaborative study of the Children's Oncology Group and the Center for International Blood and Marrow Transplant Research. *Leukemia*. 2008;22:281-286.

13. Eapen M, Raetz E, Zhang MJ, et al. Outcomes after HLA-matched sibling transplantation or chemotherapy in children with B-precursor acute lymphoblastic leukemia in a second remission: a collaborative study of the Children's Oncology Group and the Center for International Blood and Marrow Transplant Research. *Blood*. 2006;107:4961-4967.
14. Fielding AK, Rowe JM, Richards SM, et al. Prospective outcome data on 267 unselected adult patients with Philadelphia chromosome-positive acute lymphoblastic leukemia confirms superiority of allogeneic transplantation over chemotherapy in the pre-imatinib era: results from the International ALL Trial MRC UKALLXII/ECOG2993. *Blood*. 2009;113:4489-4496.
15. Goldstone AH, Richards SM, Lazarus HM, et al. In adults with standard-risk acute lymphoblastic leukemia, the greatest benefit is achieved from a matched sibling allogeneic transplantation in first complete remission, and an autologous transplantation is less effective than conventional consolidation/maintenance chemotherapy in all patients: final results of the International ALL Trial (MRC UKALL XII/ECOG E2993). *Blood*. 2008;111:1827-1833.
16. Duval M, Klein JP, He W, et al. Hematopoietic stem-cell transplantation for acute leukemia in relapse or primary induction failure. *Journal of clinical oncology : official journal of the American Society of Clinical Oncology*. 2010;28:3730-3738.
17. Marks DI, Wang T, Perez WS, et al. The outcome of full-intensity and reduced-intensity conditioning matched sibling or unrelated donor transplantation in adults with Philadelphia chromosome-negative acute lymphoblastic leukemia in first and second complete remission. *Blood*. 2010;116:366-374.
18. Marks DI, Paietta EM, Moorman AV, et al. T-cell acute lymphoblastic leukemia in adults: clinical features, immunophenotype, cytogenetics, and outcome from the large randomized prospective trial (UKALL XII/ECOG 2993). *Blood*. 2009;114:5136-5145.
19. Marks DI, Perez WS, He W, et al. Unrelated donor transplants in adults with Philadelphia-negative acute lymphoblastic leukemia in first complete remission. *Blood*. 2008;112:426-434.
20. Bishop MR, Logan BR, Gandham S, et al. Long-term outcomes of adults with acute lymphoblastic leukemia after autologous or unrelated donor bone marrow transplantation: a comparative analysis by the National Marrow Donor Program and Center for International Blood and Marrow Transplant Research. *Bone marrow transplantation*. 2008;41:635-642.
21. Fielding AK, Richards SM, Chopra R, et al. Outcome of 609 adults after relapse of acute lymphoblastic leukemia (ALL); an MRC UKALL12/ECOG 2993 study. *Blood*. 2007;109:944-950.
22. Gupta V, Richards S, Rowe J, Acute Leukemia Stem Cell Transplantation Trialists' Collaborative G. Allogeneic, but not autologous, hematopoietic cell transplantation improves survival only among younger adults with acute lymphoblastic leukemia in first remission: an individual patient data meta-analysis. *Blood*. 2013;121:339-350.
23. Hochberg J, Khaled S, Forman SJ, Cairo MS. Criteria for and outcomes of allogeneic haematopoietic stem cell transplant in children, adolescents and young adults with acute lymphoblastic leukaemia in first complete remission. *British journal of haematology*. 2013;161:27-42.
24. Eapen M, Rubinstein P, Zhang MJ, et al. Outcomes of transplantation of unrelated donor umbilical cord blood and bone marrow in children with acute leukaemia: a comparison study. *Lancet*. 2007;369:1947-1954.
25. Talano JM, Casper JT, Camitta BM, et al. Alternative donor bone marrow transplant for children with Philadelphia chromosome ALL. *Bone marrow transplantation*. 2006;37:135-141.

26. Eapen M, Rubinstein P, Zhang MJ, et al. Comparable long-term survival after unrelated and HLA-matched sibling donor hematopoietic stem cell transplantations for acute leukemia in children younger than 18 months. *Journal of clinical oncology : official journal of the American Society of Clinical Oncology*. 2006;24:145-151.
27. Laughlin MJ, Eapen M, Rubinstein P, et al. Outcomes after transplantation of cord blood or bone marrow from unrelated donors in adults with leukemia. *The New England journal of medicine*. 2004;351:2265-2275.
28. Rocha V, Labopin M, Sanz G, et al. Transplants of umbilical-cord blood or bone marrow from unrelated donors in adults with acute leukemia. *The New England journal of medicine*. 2004;351:2276-2285.
29. Luo Y, Xiao H, Lai X, et al. T-cell-replete haploidentical HSCT with low-dose anti-T-lymphocyte globulin compared with matched sibling HSCT and unrelated HSCT. *Blood*. 2014;124:2735-2743.
30. Peters C, Schrappe M, von Stackelberg A, et al. Stem-cell transplantation in children with acute lymphoblastic leukemia: A prospective international multicenter trial comparing sibling donors with matched unrelated donors-The ALL-SCT-BFM-2003 trial. *Journal of clinical oncology : official journal of the American Society of Clinical Oncology*. 2015;33:1265-1274.
31. Eckert C, Henze G, Seeger K, et al. Use of allogeneic hematopoietic stem-cell transplantation based on minimal residual disease response improves outcomes for children with relapsed acute lymphoblastic leukemia in the intermediate-risk group. *Journal of clinical oncology : official journal of the American Society of Clinical Oncology*. 2013;31:2736-2742.
32. Mann G, Attarbaschi A, Schrappe M, et al. Improved outcome with hematopoietic stem cell transplantation in a poor prognostic subgroup of infants with mixed-lineage-leukemia (MLL)-rearranged acute lymphoblastic leukemia: results from the Interfant-99 Study. *Blood*. 2010;116:2644-2650.
33. Klingebiel T, Cornish J, Labopin M, et al. Results and factors influencing outcome after fully haploidentical hematopoietic stem cell transplantation in children with very high-risk acute lymphoblastic leukemia: impact of center size: an analysis on behalf of the Acute Leukemia and Pediatric Disease Working Parties of the European Blood and Marrow Transplant group. *Blood*. 2010;115:3437-3446.
34. Schrauder A, Reiter A, Gadner H, et al. Superiority of allogeneic hematopoietic stem-cell transplantation compared with chemotherapy alone in high-risk childhood T-cell acute lymphoblastic leukemia: results from ALL-BFM 90 and 95. *Journal of clinical oncology : official journal of the American Society of Clinical Oncology*. 2006;24:5742-5749.
35. Balduzzi A, Valsecchi MG, Uderzo C, et al. Chemotherapy versus allogeneic transplantation for very-high-risk childhood acute lymphoblastic leukaemia in first complete remission: comparison by genetic randomisation in an international prospective study. *Lancet*. 2005;366:635-642.

## Acute promyelocytic leukemia

1. NCCN clinical practice guidelines in oncology (NCCN guidelines). Acute myeloid leukemia. Version 1.2015. Available at [www.nccn.org](http://www.nccn.org) (accessed 02/01/2015).
2. Thirugnanam R, George B, Chendamarai E, et al. Comparison of clinical outcomes of patients with relapsed acute promyelocytic leukemia induced with arsenic trioxide and consolidated with either an autologous stem cell transplant or an arsenic trioxide-based regimen. *Biology of blood and marrow transplantation : journal of the American Society for Blood and Marrow Transplantation*. 2009;15:1479-1484.
3. Dvorak CC, Agarwal R, Dahl GV, Gregory JJ, Feusner JH. Hematopoietic stem cell transplant for pediatric acute promyelocytic leukemia. *Biology of blood and marrow transplantation : journal of the American Society for Blood and Marrow Transplantation*. 2008;14:824-830.
4. de Botton S, Fawaz A, Chevret S, et al. Autologous and allogeneic stem-cell transplantation as salvage treatment of acute promyelocytic leukemia initially treated with all-trans-retinoic acid: a retrospective analysis of the European acute promyelocytic leukemia group. *Journal of clinical oncology : official journal of the American Society of Clinical Oncology*. 2005;23:120-126.
5. Sanz MA, Grimwade D, Tallman MS, et al. Management of acute promyelocytic leukemia: recommendations from an expert panel on behalf of the European LeukemiaNet. *Blood*. 2009;113:1875-1891.
6. Lo-Coco F, Romano A, Mengarelli A, et al. Allogeneic stem cell transplantation for advanced acute promyelocytic leukemia: results in patients treated in second molecular remission or with molecularly persistent disease. *Leukemia*. 2003;17:1930-1933.

## Myelodysplastic syndromes

1. Oliansky DM, Antin JH, Bennett JM, et al. The role of cytotoxic therapy with hematopoietic stem cell transplantation in the therapy of myelodysplastic syndromes: an evidence-based review. *Biology of blood and marrow transplantation : journal of the American Society for Blood and Marrow Transplantation*. 2009;15:137-172.
2. NCCN clinical practice guidelines in oncology (NCCN guidelines). Myelodysplastic syndromes. Version 2.2015. Available at [www.nccn.org](http://www.nccn.org) (accessed 05/01/2015).
3. Malcovati L, Hellstrom-Lindberg E, Bowen D, et al. Diagnosis and treatment of primary myelodysplastic syndromes in adults: recommendations from the European LeukemiaNet. *Blood*. 2013;122:2943-2964.
4. Cutler CS, Lee SJ, Greenberg P, et al. A decision analysis of allogeneic bone marrow transplantation for the myelodysplastic syndromes: delayed transplantation for low-risk myelodysplasia is associated with improved outcome. *Blood*. 2004;104:579-585.
5. Koreth J, Pidala J, Perez WS, et al. Role of reduced-intensity conditioning allogeneic hematopoietic stem-cell transplantation in older patients with de novo myelodysplastic syndromes: an international collaborative decision analysis. *Journal of clinical oncology : official journal of the American Society of Clinical Oncology*. 2013;31:2662-2670.
6. Giralt SA, Horowitz M, Weisdorf D, Cutler C. Review of stem-cell transplantation for myelodysplastic syndromes in older patients in the context of the Decision Memo for Allogeneic Hematopoietic Stem Cell Transplantation for Myelodysplastic Syndrome emanating from the Centers for Medicare and Medicaid Services. *Journal of clinical oncology : official journal of the American Society of Clinical Oncology*. 2011;29:566-572.
7. McClune BL, Weisdorf DJ, Pedersen TL, et al. Effect of age on outcome of reduced-intensity hematopoietic cell transplantation for older patients with acute myeloid leukemia in first complete remission or with myelodysplastic syndrome. *Journal of clinical oncology : official journal of the American Society of Clinical Oncology*. 2010;28:1878-1887.
8. Lim Z, Brand R, Martino R, et al. Allogeneic hematopoietic stem-cell transplantation for patients 50 years or older with myelodysplastic syndromes or secondary acute myeloid leukemia. *Journal of clinical oncology : official journal of the American Society of Clinical Oncology*. 2010;28:405-411.
9. Platzbecker U, Schetelig J, Finke J, et al. Allogeneic hematopoietic cell transplantation in patients age 60-70 years with de novo high-risk myelodysplastic syndrome or secondary acute myelogenous leukemia: comparison with patients lacking donors who received azacitidine. *Biology of blood and marrow transplantation : journal of the American Society for Blood and Marrow Transplantation*. 2012;18:1415-1421.
10. Saber W, Cutler CS, Nakamura R, et al. Impact of donor source on hematopoietic cell transplantation outcomes for patients with myelodysplastic syndromes (MDS). *Blood*. 2013;122:1974-1982.
11. Robin M, Porcher R, Ades L, et al. HLA-matched allogeneic stem cell transplantation improves outcome of higher risk myelodysplastic syndrome A prospective study on behalf of SFGM-TC and GFM. *Leukemia*. 2015.

## Myelofibrosis and myeloproliferative diseases

1. Kroger N, Giorgino T, Scott BL, et al. Impact of allogeneic stem cell transplantation on survival of patients less than 65 years of age with primary myelofibrosis. *Blood*. 2015;125:3347-3350.
2. Barbui T, Barosi G, Birgegard G, et al. Philadelphia-negative classical myeloproliferative neoplasms: critical concepts and management recommendations from European LeukemiaNet. *Journal of clinical oncology : official journal of the American Society of Clinical Oncology*. 2011;29:761-770.
3. Tamari R, Mughal TI, Rondelli D, et al. Allo-SCT for myelofibrosis: reversing the chronic phase in the JAK inhibitor era? *Bone marrow transplantation*. 2015;50:628-636.
4. Rondelli D, Goldberg JD, Isola L, et al. MPD-RC 101 prospective study of reduced-intensity allogeneic hematopoietic stem cell transplantation in patients with myelofibrosis. *Blood*. 2014;124:1183-1191.
5. Kroger N, Holler E, Kobbe G, et al. Allogeneic stem cell transplantation after reduced-intensity conditioning in patients with myelofibrosis: a prospective, multicenter study of the Chronic Leukemia Working Party of the European Group for Blood and Marrow Transplantation. *Blood*. 2009;114:5264-5270.
6. Lussana F, Rambaldi A, Finazzi MC, et al. Allogeneic hematopoietic stem cell transplantation in patients with polycythemia vera or essential thrombocythemia transformed to myelofibrosis or acute myeloid leukemia: a report from the MPN Subcommittee of the Chronic Malignancies Working Party of the European Group for Blood and Marrow Transplantation. *Haematologica*. 2014;99:916-921.
7. Gupta V, Malone AK, Hari PN, et al. Reduced-intensity hematopoietic cell transplantation for patients with primary myelofibrosis: a cohort analysis from the center for international blood and marrow transplant research. *Biology of blood and marrow transplantation : journal of the American Society for Blood and Marrow Transplantation*. 2014;20:89-97.
8. Ballen KK, Shrestha S, Sobocinski KA, et al. Outcome of transplantation for myelofibrosis. *Biology of blood and marrow transplantation : journal of the American Society for Blood and Marrow Transplantation*. 2010;16:358-367.
9. Samuelson S, Sandmaier BM, Heslop HE, et al. Allogeneic haematopoietic cell transplantation for myelofibrosis in 30 patients 60-78 years of age. *British journal of haematology*. 2011;153:76-82.
10. Robin M, Giannotti F, Deconinck E, et al. Unrelated cord blood transplantation for patients with primary or secondary myelofibrosis. *Biology of blood and marrow transplantation : journal of the American Society for Blood and Marrow Transplantation*. 2014;20:1841-1846.
11. Ueno NT, Anagnostopoulos A, Rondon G, et al. Successful non-myeloablative allogeneic transplantation for treatment of idiopathic hypereosinophilic syndrome. *British journal of haematology*. 2002;119:131-134.
12. Halaburda K, Prejzner W, Szatkowski D, Limon J, Hellmann A. Allogeneic bone marrow transplantation for hypereosinophilic syndrome: long-term follow-up with eradication of FIP1L1-PDGFR fusion transcript. *Bone marrow transplantation*. 2006;38:319-320.
13. Fathi AT, Dec GW, Jr., Richter JM, et al. Case records of the Massachusetts General Hospital. Case 7-2014. A 27-year-old man with diarrhea, fatigue, and eosinophilia. *The New England journal of medicine*. 2014;370:861-872.

## Chronic myeloid leukemia

1. Arora M, Weisdorf DJ, Spellman SR, et al. HLA-identical sibling compared with 8/8 matched and mismatched unrelated donor bone marrow transplant for chronic phase chronic myeloid leukemia. *Journal of clinical oncology : official journal of the American Society of Clinical Oncology*. 2009;27:1644-1652.
2. Jabbour E, Cortes J, Kantarjian H, et al. Novel tyrosine kinase inhibitor therapy before allogeneic stem cell transplantation in patients with chronic myeloid leukemia: no evidence for increased transplant-related toxicity. *Cancer*. 2007;110:340-344.
3. Weisser M, Schleuning M, Haferlach C, Schwerdtfeger R, Kolb HJ. Allogeneic stem-cell transplantation provides excellent results in advanced stage chronic myeloid leukemia with major cytogenetic response to pre-transplant imatinib therapy. *Leukemia & lymphoma*. 2007;48:295-301.
4. de la Fuente J, Baruchel A, Biondi A, et al. Managing children with chronic myeloid leukaemia (CML): recommendations for the management of CML in children and young people up to the age of 18 years. *British journal of haematology*. 2014;167:33-47.
5. Shen K, Liu Q, Sun J, et al. Prior exposure to imatinib does not impact outcome of allogeneic hematopoietic transplantation for chronic myeloid leukemia patients: a single-center experience in china. *Int J Clin Exp Med*. 2015;8:2495-2505.
6. Nair AP, Barnett MJ, Broady RC, et al. Allogeneic Hematopoietic Stem Cell Transplantation Is an Effective Salvage Therapy for Patients with Chronic Myeloid Leukemia Presenting with Advanced Disease or Failing Treatment with Tyrosine Kinase Inhibitors. *Biology of blood and marrow transplantation : journal of the American Society for Blood and Marrow Transplantation*. 2015.
7. Ohashi K, Nagamura-Inoue T, Nagamura F, et al. Effect of graft sources on allogeneic hematopoietic stem cell transplantation outcome in adults with chronic myeloid leukemia in the era of tyrosine kinase inhibitors: a Japanese Society of Hematopoietic Cell Transplantation retrospective analysis. *Int J Hematol*. 2014;100:296-306.
8. Zhao Y, Luo Y, Shi J, Cai Z, Huang H. Second-generation tyrosine kinase inhibitors combined with stem cell transplantation in patients with imatinib-refractory chronic myeloid leukemia. *Am J Med Sci*. 2014;347:439-445.
9. Zheng C, Tang B, Yao W, et al. Comparison of unrelated cord blood transplantation and HLA-matched sibling hematopoietic stem cell transplantation for patients with chronic myeloid leukemia in advanced stage. *Biology of blood and marrow transplantation : journal of the American Society for Blood and Marrow Transplantation*. 2013;19:1708-1712.
10. Lee SE, Choi SY, Kim SH, et al. Prognostic factors for outcomes of allogeneic stem cell transplantation in chronic phase chronic myeloid leukemia in the era of tyrosine kinase inhibitors. *Hematology*. 2014;19:63-72.
11. Velev N, Cortes J, Champlin R, et al. Stem cell transplantation for patients with chronic myeloid leukemia resistant to tyrosine kinase inhibitors with BCR-ABL kinase domain mutation T315I. *Cancer*. 2010;116:3631-3637.
12. Pavlu J, Kew AK, Taylor-Roberts B, et al. Optimizing patient selection for myeloablative allogeneic hematopoietic cell transplantation in chronic myeloid leukemia in chronic phase. *Blood*. 2010;115:4018-4020.
13. Saussele S, Lauseker M, Gratwohl A, et al. Allogeneic hematopoietic stem cell transplantation (allo SCT) for chronic myeloid leukemia in the imatinib era: evaluation of its impact within a subgroup of the randomized German CML Study IV. *Blood*. 2010;115:1880-1885.
14. Gratwohl A, Brand R, Apperley J, et al. Allogeneic hematopoietic stem cell transplantation for chronic myeloid leukemia in Europe 2006: transplant activity, long-

- term data and current results. An analysis by the Chronic Leukemia Working Party of the European Group for Blood and Marrow Transplantation (EBMT). *Haematologica*. 2006;91:513-521.
15. Crawley C, Szydlo R, Lalancette M, et al. Outcomes of reduced-intensity transplantation for chronic myeloid leukemia: an analysis of prognostic factors from the Chronic Leukemia Working Party of the EBMT. *Blood*. 2005;106:2969-2976.
  16. Oehler VG, Radich JP, Storer B, et al. Randomized trial of allogeneic related bone marrow transplantation versus peripheral blood stem cell transplantation for chronic myeloid leukemia. *Biology of blood and marrow transplantation : journal of the American Society for Blood and Marrow Transplantation*. 2005;11:85-92.

## Diffuse large B-cell lymphoma

1. Oliansky DM, Czuczman M, Fisher RI, et al. The role of cytotoxic therapy with hematopoietic stem cell transplantation in the treatment of diffuse large B cell lymphoma: update of the 2001 evidence-based review. *Biology of blood and marrow transplantation : journal of the American Society for Blood and Marrow Transplantation*. 2011;17:20-47 e30.
2. NCCN clinical practice guidelines in oncology (NCCN guidelines). Non-Hodgkin's lymphomas. Version 2.2015. Available at [www.nccn.org](http://www.nccn.org) (accessed 05/01/2015).
3. Chen YB, Lane AA, Logan BR, et al. Impact of conditioning regimen on outcomes for patients with lymphoma undergoing high-dose therapy with autologous hematopoietic cell transplantation. *Biology of blood and marrow transplantation : journal of the American Society for Blood and Marrow Transplantation*. 2015;21:1046-1053.
4. van Besien K, Carreras J, Bierman PJ, et al. Unrelated donor hematopoietic cell transplantation for non-hodgkin lymphoma: long-term outcomes. *Biology of blood and marrow transplantation : journal of the American Society for Blood and Marrow Transplantation*. 2009;15:554-563.
5. Ratanatharathorn V, Logan B, Wang D, et al. Prior rituximab correlates with less acute graft-versus-host disease and better survival in B-cell lymphoma patients who received allogeneic peripheral blood stem cell transplantation. *British journal of haematology*. 2009;145:816-824.
6. Dahi PB, Tamari R, Devlin SM, et al. Favorable outcomes in elderly patients undergoing high-dose therapy and autologous stem cell transplantation for non-Hodgkin lymphoma. *Biology of blood and marrow transplantation : journal of the American Society for Blood and Marrow Transplantation*. 2014;20:2004-2009.
7. Hamadani M, Hari PN, Zhang Y, et al. Early failure of frontline rituximab-containing chemo-immunotherapy in diffuse large B cell lymphoma does not predict futility of autologous hematopoietic cell transplantation. *Biology of blood and marrow transplantation : journal of the American Society for Blood and Marrow Transplantation*. 2014;20:1729-1736.
8. Wirk B, Fenske TS, Hamadani M, et al. Outcomes of hematopoietic cell transplantation for diffuse large B cell lymphoma transformed from follicular lymphoma. *Biology of blood and marrow transplantation : journal of the American Society for Blood and Marrow Transplantation*. 2014;20:951-959.
9. Hamadani M, Saber W, Ahn KW, et al. Impact of pretransplantation conditioning regimens on outcomes of allogeneic transplantation for chemotherapy-unresponsive diffuse large B cell lymphoma and grade III follicular lymphoma. *Biology of blood and marrow transplantation : journal of the American Society for Blood and Marrow Transplantation*. 2013;19:746-753.
10. Horstmann K, Boumendil A, Finke J, et al. Second allo-SCT in patients with lymphoma relapse after a first allogeneic transplantation. A retrospective study of the EBMT Lymphoma Working Party. *Bone marrow transplantation*. 2015.
11. Peniket AJ, Ruiz de Elvira MC, Taghipour G, et al. An EBMT registry matched study of allogeneic stem cell transplants for lymphoma: allogeneic transplantation is associated with a lower relapse rate but a higher procedure-related mortality rate than autologous transplantation. *Bone marrow transplantation*. 2003;31:667-678.
12. Lazarus HM, Zhang MJ, Carreras J, et al. A comparison of HLA-identical sibling allogeneic versus autologous transplantation for diffuse large B cell lymphoma: a report from the CIBMTR. *Biology of blood and marrow transplantation : journal of the American Society for Blood and Marrow Transplantation*. 2010;16:35-45.

13. Tarella C, Zanni M, Magni M, et al. Rituximab improves the efficacy of high-dose chemotherapy with autograft for high-risk follicular and diffuse large B-cell lymphoma: a multicenter Gruppo Italiano Terapie Innovative nei linfomi survey. *Journal of clinical oncology : official journal of the American Society of Clinical Oncology*. 2008;26:3166-3175.
14. Tarella C, Zanni M, Di Nicola M, et al. Prolonged survival in poor-risk diffuse large B-cell lymphoma following front-line treatment with rituximab-supplemented, early-intensified chemotherapy with multiple autologous hematopoietic stem cell support: a multicenter study by GITIL (Gruppo Italiano Terapie Innovative nei Linfomi). *Leukemia*. 2007;21:1802-1811.
15. Nyman H, Jantunen E, Juvonen E, et al. Impact of germinal center and non-germinal center phenotypes on overall and failure-free survival after high-dose chemotherapy and auto-SCT in primary diffuse large B-cell lymphoma. *Bone marrow transplantation*. 2008;42:93-98.
16. Jantunen E, Canals C, Rambaldi A, et al. Autologous stem cell transplantation in elderly patients (> or =60 years) with diffuse large B-cell lymphoma: an analysis based on data in the European Blood and Marrow Transplantation registry. *Haematologica*. 2008;93:1837-1842.
17. van Kampen RJ, Canals C, Schouten HC, et al. Allogeneic stem-cell transplantation as salvage therapy for patients with diffuse large B-cell non-Hodgkin's lymphoma relapsing after an autologous stem-cell transplantation: an analysis of the European Group for Blood and Marrow Transplantation Registry. *Journal of clinical oncology : official journal of the American Society of Clinical Oncology*. 2011;29:1342-1348.
18. Rodrigues CA, Sanz G, Brunstein CG, et al. Analysis of risk factors for outcomes after unrelated cord blood transplantation in adults with lymphoid malignancies: a study by the Eurocord-Netcord and lymphoma working party of the European group for blood and marrow transplantation. *Journal of clinical oncology : official journal of the American Society of Clinical Oncology*. 2009;27:256-263.
19. Stiff PJ, Unger JM, Cook JR, et al. Autologous transplantation as consolidation for aggressive non-Hodgkin's lymphoma. *The New England journal of medicine*. 2013;369:1681-1690.
20. Armand P, Welch S, Kim HT, et al. Prognostic factors for patients with diffuse large B cell lymphoma and transformed indolent lymphoma undergoing autologous stem cell transplantation in the positron emission tomography era. *British journal of haematology*. 2013;160:608-617.
21. Rezvani AR, Norasetthada L, Gooley T, et al. Non-myeloablative allogeneic haematopoietic cell transplantation for relapsed diffuse large B-cell lymphoma: a multicentre experience. *British journal of haematology*. 2008;143:395-403.

## Follicular lymphoma

1. Oliansky DM, Gordon LI, King J, et al. The role of cytotoxic therapy with hematopoietic stem cell transplantation in the treatment of follicular lymphoma: an evidence-based review. *Biology of blood and marrow transplantation : journal of the American Society for Blood and Marrow Transplantation*. 2010;16:443-468.
2. Montoto S, Corradini P, Dreyling M, et al. Indications for hematopoietic stem cell transplantation in patients with follicular lymphoma: a consensus project of the EBMT-Lymphoma Working Party. *Haematologica*. 2013;98:1014-1021.
3. NCCN clinical practice guidelines in oncology (NCCN guidelines). Non-Hodgkin's lymphomas. Version 2.2015. Available at [www.nccn.org](http://www.nccn.org) (accessed 05/01/2015).
4. Chen YB, Lane AA, Logan BR, et al. Impact of conditioning regimen on outcomes for patients with lymphoma undergoing high-dose therapy with autologous hematopoietic cell transplantation. *Biology of blood and marrow transplantation : journal of the American Society for Blood and Marrow Transplantation*. 2015;21:1046-1053.
5. van Besien K, Carreras J, Bierman PJ, et al. Unrelated donor hematopoietic cell transplantation for non-hodgkin lymphoma: long-term outcomes. *Biology of blood and marrow transplantation : journal of the American Society for Blood and Marrow Transplantation*. 2009;15:554-563.
6. Ratanatharathorn V, Logan B, Wang D, et al. Prior rituximab correlates with less acute graft-versus-host disease and better survival in B-cell lymphoma patients who received allogeneic peripheral blood stem cell transplantation. *British journal of haematology*. 2009;145:816-824.
7. Hamadani M, Saber W, Ahn KW, et al. Impact of pretransplantation conditioning regimens on outcomes of allogeneic transplantation for chemotherapy-unresponsive diffuse large B cell lymphoma and grade III follicular lymphoma. *Biology of blood and marrow transplantation : journal of the American Society for Blood and Marrow Transplantation*. 2013;19:746-753.
8. Horstmann K, Boumendil A, Finke J, et al. Second allo-SCT in patients with lymphoma relapse after a first allogeneic transplantation. A retrospective study of the EBMT Lymphoma Working Party. *Bone marrow transplantation*. 2015.
9. El-Najjar I, Boumendil A, Luan JJ, et al. The impact of total body irradiation on the outcome of patients with follicular lymphoma treated with autologous stem-cell transplantation in the modern era: a retrospective study of the EBMT Lymphoma Working Party. *Ann Oncol*. 2014;25:2224-2229.
10. Robinson SP, Canals C, Luang JJ, et al. The outcome of reduced intensity allogeneic stem cell transplantation and autologous stem cell transplantation when performed as a first transplant strategy in relapsed follicular lymphoma: an analysis from the Lymphoma Working Party of the EBMT. *Bone marrow transplantation*. 2013;48:1409-1414.
11. Montoto S, Canals C, Rohatiner AZ, et al. Long-term follow-up of high-dose treatment with autologous haematopoietic progenitor cell support in 693 patients with follicular lymphoma: an EBMT registry study. *Leukemia*. 2007;21:2324-2331.
12. Peniket AJ, Ruiz de Elvira MC, Taghipour G, et al. An EBMT registry matched study of allogeneic stem cell transplants for lymphoma: allogeneic transplantation is associated with a lower relapse rate but a higher procedure-related mortality rate than autologous transplantation. *Bone marrow transplantation*. 2003;31:667-678.
13. Lazarus HM, Carreras J, Boudreau C, et al. Influence of age and histology on outcome in adult non-Hodgkin lymphoma patients undergoing autologous hematopoietic cell transplantation (HCT): a report from the Center For International Blood & Marrow Transplant Research (CIBMTR). *Biology of blood and marrow transplantation : journal of the American Society for Blood and Marrow Transplantation*. 2008;14:1323-1333.

14. Tarella C, Zanni M, Magni M, et al. Rituximab improves the efficacy of high-dose chemotherapy with autograft for high-risk follicular and diffuse large B-cell lymphoma: a multicenter Gruppo Italiano Terapie Innovative nei linfomi survey. *Journal of clinical oncology : official journal of the American Society of Clinical Oncology*. 2008;26:3166-3175.
15. Ladetto M, De Marco F, Benedetti F, et al. Prospective, multicenter randomized GITMO/IIL trial comparing intensive (R-HDS) versus conventional (CHOP-R) chemoimmunotherapy in high-risk follicular lymphoma at diagnosis: the superior disease control of R-HDS does not translate into an overall survival advantage. *Blood*. 2008;111:4004-4013.
16. Ladetto M, Vallet S, Benedetti F, et al. Prolonged survival and low incidence of late toxic sequelae in advanced follicular lymphoma treated with a TBI-free autografting program: updated results of the multicenter consecutive GITMO trial. *Leukemia*. 2006;20:1840-1847.
17. Corradini P, Ladetto M, Zallio F, et al. Long-term follow-up of indolent lymphoma patients treated with high-dose sequential chemotherapy and autografting: evidence that durable molecular and clinical remission frequently can be attained only in follicular subtypes. *Journal of clinical oncology : official journal of the American Society of Clinical Oncology*. 2004;22:1460-1468.
18. Ladetto M, Corradini P, Vallet S, et al. High rate of clinical and molecular remissions in follicular lymphoma patients receiving high-dose sequential chemotherapy and autografting at diagnosis: a multicenter, prospective study by the Gruppo Italiano Trapianto Midollo Osseo (GITMO). *Blood*. 2002;100:1559-1565.
19. Rodrigues CA, Sanz G, Brunstein CG, et al. Analysis of risk factors for outcomes after unrelated cord blood transplantation in adults with lymphoid malignancies: a study by the Eurocord-Netcord and lymphoma working party of the European group for blood and marrow transplantation. *Journal of clinical oncology : official journal of the American Society of Clinical Oncology*. 2009;27:256-263.
20. Avivi I, Montoto S, Canals C, et al. Matched unrelated donor stem cell transplant in 131 patients with follicular lymphoma: an analysis from the Lymphoma Working Party of the European Group for Blood and Marrow Transplantation. *British journal of haematology*. 2009;147:719-728.
21. Armand P, Welch S, Kim HT, et al. Prognostic factors for patients with diffuse large B cell lymphoma and transformed indolent lymphoma undergoing autologous stem cell transplantation in the positron emission tomography era. *British journal of haematology*. 2013;160:608-617.
22. Rezvani AR, Storer B, Maris M, et al. Nonmyeloablative allogeneic hematopoietic cell transplantation in relapsed, refractory, and transformed indolent non-Hodgkin's lymphoma. *Journal of clinical oncology : official journal of the American Society of Clinical Oncology*. 2008;26:211-217.
23. Schouten HC, Qian W, Kvaloy S, et al. High-dose therapy improves progression-free survival and survival in relapsed follicular non-Hodgkin's lymphoma: results from the randomized European CUP trial. *Journal of clinical oncology : official journal of the American Society of Clinical Oncology*. 2003;21:3918-3927.
24. van Besien K, Loberiza FR, Jr., Bajorunaite R, et al. Comparison of autologous and allogeneic hematopoietic stem cell transplantation for follicular lymphoma. *Blood*. 2003;102:3521-3529.

## T-cell lymphoma

1. NCCN clinical practice guidelines in oncology (NCCN guidelines). Non-Hodgkin's lymphomas. Version 2.2015. Available at [www.nccn.org](http://www.nccn.org) (accessed 05/01/2015).
2. Chen YB, Lane AA, Logan BR, et al. Impact of conditioning regimen on outcomes for patients with lymphoma undergoing high-dose therapy with autologous hematopoietic cell transplantation. *Biology of blood and marrow transplantation : journal of the American Society for Blood and Marrow Transplantation*. 2015;21:1046-1053.
3. van Besien K, Carreras J, Bierman PJ, et al. Unrelated donor hematopoietic cell transplantation for non-hodgkin lymphoma: long-term outcomes. *Biology of blood and marrow transplantation : journal of the American Society for Blood and Marrow Transplantation*. 2009;15:554-563.
4. Dahi PB, Tamari R, Devlin SM, et al. Favorable outcomes in elderly patients undergoing high-dose therapy and autologous stem cell transplantation for non-Hodgkin lymphoma. *Biology of blood and marrow transplantation : journal of the American Society for Blood and Marrow Transplantation*. 2014;20:2004-2009.
5. Horstmann K, Boumendil A, Finke J, et al. Second allo-SCT in patients with lymphoma relapse after a first allogeneic transplantation. A retrospective study of the EBMT Lymphoma Working Party. *Bone marrow transplantation*. 2015.
6. Tanase A, Schmitz N, Stein H, et al. Allogeneic and autologous stem cell transplantation for hepatosplenic T-cell lymphoma: a retrospective study of the EBMT Lymphoma Working Party. *Leukemia*. 2015;29:686-688.
7. Bazarbachi A, Cwynarski K, Boumendil A, et al. Outcome of patients with HTLV-1-associated adult T-cell leukemia/lymphoma after SCT: a retrospective study by the EBMT LWP. *Bone marrow transplantation*. 2014;49:1266-1268.
8. Jantunen E, Boumendil A, Finel H, et al. Autologous stem cell transplantation for enteropathy-associated T-cell lymphoma: a retrospective study by the EBMT. *Blood*. 2013;121:2529-2532.
9. Peniket AJ, Ruiz de Elvira MC, Taghipour G, et al. An EBMT registry matched study of allogeneic stem cell transplants for lymphoma: allogeneic transplantation is associated with a lower relapse rate but a higher procedure-related mortality rate than autologous transplantation. *Bone marrow transplantation*. 2003;31:667-678.
10. Corradini P, Vitolo U, Rambaldi A, et al. Intensified chemo-immunotherapy with or without stem cell transplantation in newly diagnosed patients with peripheral T-cell lymphoma. *Leukemia*. 2014;28:1885-1891.
11. Doderio A, Spina F, Narni F, et al. Allogeneic transplantation following a reduced-intensity conditioning regimen in relapsed/refractory peripheral T-cell lymphomas: long-term remissions and response to donor lymphocyte infusions support the role of a graft-versus-lymphoma effect. *Leukemia*. 2012;26:520-526.
12. Corradini P, Doderio A, Zallio F, et al. Graft-versus-lymphoma effect in relapsed peripheral T-cell non-Hodgkin's lymphomas after reduced-intensity conditioning followed by allogeneic transplantation of hematopoietic cells. *Journal of clinical oncology : official journal of the American Society of Clinical Oncology*. 2004;22:2172-2176.
13. d'Amore F, Relander T, Lauritzsen GF, et al. Up-front autologous stem-cell transplantation in peripheral T-cell lymphoma: NLG-T-01. *Journal of clinical oncology : official journal of the American Society of Clinical Oncology*. 2012;30:3093-3099.
14. Duarte RF, Canals C, Onida F, et al. Allogeneic hematopoietic cell transplantation for patients with mycosis fungoides and Sezary syndrome: a retrospective analysis of the Lymphoma Working Party of the European Group for Blood and Marrow Transplantation. *Journal of clinical oncology : official journal of the American Society of Clinical Oncology*. 2010;28:4492-4499.

15. Kyriakou C, Canals C, Finke J, et al. Allogeneic stem cell transplantation is able to induce long-term remissions in angioimmunoblastic T-cell lymphoma: a retrospective study from the lymphoma working party of the European group for blood and marrow transplantation. *Journal of clinical oncology : official journal of the American Society of Clinical Oncology*. 2009;27:3951-3958.
16. Kyriakou C, Canals C, Goldstone A, et al. High-dose therapy and autologous stem-cell transplantation in angioimmunoblastic lymphoma: complete remission at transplantation is the major determinant of Outcome-Lymphoma Working Party of the European Group for Blood and Marrow Transplantation. *Journal of clinical oncology : official journal of the American Society of Clinical Oncology*. 2008;26:218-224.
17. Moritz RK, Ditschkowski M, Klemke CD, et al. Allogeneic stem cell transplantation in patients with aggressive primary cutaneous T-cell lymphoma - a case series of the ADF working group "cutaneous lymphomas". *J Dtsch Dermatol Ges*. 2014;12:39-46.
18. Ingen-Housz-Oro S, Bachelez H, Verola O, et al. High-dose therapy and autologous stem cell transplantation in relapsing cutaneous lymphoma. *Bone marrow transplantation*. 2004;33:629-634.
19. Jacobsen ED, Kim HT, Ho VT, et al. A large single-center experience with allogeneic stem-cell transplantation for peripheral T-cell non-Hodgkin lymphoma and advanced mycosis fungoides/Sezary syndrome. *Ann Oncol*. 2011;22:1608-1613.
20. Strullu M, Thomas C, Le Deley MC, et al. Hematopoietic stem cell transplantation in relapsed ALK+ anaplastic large cell lymphoma in children and adolescents: a study on behalf of the SFCE and SFGM-TC. *Bone marrow transplantation*. 2015.
21. Fukano R, Mori T, Kobayashi R, et al. Haematopoietic stem cell transplantation for relapsed or refractory anaplastic large cell lymphoma: a study of children and adolescents in Japan. *British journal of haematology*. 2015;168:557-563.
22. Woessmann W, Peters C, Lenhard M, et al. Allogeneic haematopoietic stem cell transplantation in relapsed or refractory anaplastic large cell lymphoma of children and adolescents--a Berlin-Frankfurt-Munster group report. *British journal of haematology*. 2006;133:176-182.
23. Kanakry JA, Kasamon YL, Gocke CD, et al. Outcomes of related donor HLA-identical or HLA-haploidentical allogeneic blood or marrow transplantation for peripheral T cell lymphoma. *Biology of blood and marrow transplantation : journal of the American Society for Blood and Marrow Transplantation*. 2013;19:602-606.

## Mantle cell lymphoma

1. NCCN clinical practice guidelines in oncology (NCCN guidelines). Non-Hodgkin's lymphomas. Version 2.2015. Available at [www.nccn.org](http://www.nccn.org) (accessed 05/01/2015).
2. Robinson S, Dreger P, Caballero D, et al. The EBMT/EMCL consensus project on the role of autologous and allogeneic stem cell transplantation in mantle cell lymphoma. *Leukemia*. 2015;29:464-473.
3. Chen YB, Lane AA, Logan BR, et al. Impact of conditioning regimen on outcomes for patients with lymphoma undergoing high-dose therapy with autologous hematopoietic cell transplantation. *Biology of blood and marrow transplantation : journal of the American Society for Blood and Marrow Transplantation*. 2015;21:1046-1053.
4. van Besien K, Carreras J, Bierman PJ, et al. Unrelated donor hematopoietic cell transplantation for non-hodgkin lymphoma: long-term outcomes. *Biology of blood and marrow transplantation : journal of the American Society for Blood and Marrow Transplantation*. 2009;15:554-563.
5. Dahi PB, Tamari R, Devlin SM, et al. Favorable outcomes in elderly patients undergoing high-dose therapy and autologous stem cell transplantation for non-Hodgkin lymphoma. *Biology of blood and marrow transplantation : journal of the American Society for Blood and Marrow Transplantation*. 2014;20:2004-2009.
6. Fenske TS, Zhang MJ, Carreras J, et al. Autologous or reduced-intensity conditioning allogeneic hematopoietic cell transplantation for chemotherapy-sensitive mantle-cell lymphoma: analysis of transplantation timing and modality. *Journal of clinical oncology : official journal of the American Society of Clinical Oncology*. 2014;32:273-281.
7. Hamadani M, Saber W, Ahn KW, et al. Allogeneic hematopoietic cell transplantation for chemotherapy-unresponsive mantle cell lymphoma: a cohort analysis from the center for international blood and marrow transplant research. *Biology of blood and marrow transplantation : journal of the American Society for Blood and Marrow Transplantation*. 2013;19:625-631.
8. Horstmann K, Boumendil A, Finke J, et al. Second allo-SCT in patients with lymphoma relapse after a first allogeneic transplantation. A retrospective study of the EBMT Lymphoma Working Party. *Bone marrow transplantation*. 2015.
9. Dietrich S, Boumendil A, Finel H, et al. Outcome and prognostic factors in patients with mantle-cell lymphoma relapsing after autologous stem-cell transplantation: a retrospective study of the European Group for Blood and Marrow Transplantation (EBMT). *Ann Oncol*. 2014;25:1053-1058.
10. Jantunen E, Canals C, Attal M, et al. Autologous stem-cell transplantation in patients with mantle cell lymphoma beyond 65 years of age: a study from the European Group for Blood and Marrow Transplantation (EBMT). *Ann Oncol*. 2012;23:166-171.
11. Peniket AJ, Ruiz de Elvira MC, Taghipour G, et al. An EBMT registry matched study of allogeneic stem cell transplants for lymphoma: allogeneic transplantation is associated with a lower relapse rate but a higher procedure-related mortality rate than autologous transplantation. *Bone marrow transplantation*. 2003;31:667-678.
12. Gianni AM, Magni M, Martelli M, et al. Long-term remission in mantle cell lymphoma following high-dose sequential chemotherapy and in vivo rituximab-purged stem cell autografting (R-HDS regimen). *Blood*. 2003;102:749-755.

## Hodgkin lymphoma

1. Perales MA, Ceberio I, Armand P, et al. Role of Cytotoxic Therapy with Hematopoietic Cell Transplantation in the Treatment of Hodgkin Lymphoma: Guidelines from the American Society for Blood and Marrow Transplantation. *Biology of blood and marrow transplantation : journal of the American Society for Blood and Marrow Transplantation*. 2015.
2. NCCN clinical practice guidelines in oncology (NCCN guidelines). Hodgkin lymphoma. Version 2.2015. Available at [www.nccn.org](http://www.nccn.org) (accessed 05/01/2015).
3. Rancea M, Monsef I, von Tresckow B, Engert A, Skoetz N. High-dose chemotherapy followed by autologous stem cell transplantation for patients with relapsed/refractory Hodgkin lymphoma. *Cochrane Database Syst Rev*. 2013;6:CD009411.
4. Collins GP, Parker AN, Pocock C, et al. Guideline on the management of primary resistant and relapsed classical Hodgkin lymphoma. *British journal of haematology*. 2014;164:39-52.
5. Gorde-Grosjean S, Oberlin O, Leblanc T, et al. Outcome of children and adolescents with recurrent/refractory classical Hodgkin lymphoma, a study from the Societe Francaise de Lutte contre le Cancer des Enfants et des Adolescents (SFCE). *British journal of haematology*. 2012;158:649-656.
6. Lieskovsky YE, Donaldson SS, Torres MA, et al. High-dose therapy and autologous hematopoietic stem-cell transplantation for recurrent or refractory pediatric Hodgkin's disease: results and prognostic indices. *Journal of clinical oncology : official journal of the American Society of Clinical Oncology*. 2004;22:4532-4540.
7. Metzger ML, Hudson MM, Krasin MJ, et al. Initial response to salvage therapy determines prognosis in relapsed pediatric Hodgkin lymphoma patients. *Cancer*. 2010;116:4376-4384.
8. Federico M, Bellei M, Brice P, et al. High-dose therapy and autologous stem-cell transplantation versus conventional therapy for patients with advanced Hodgkin's lymphoma responding to front-line therapy. *Journal of clinical oncology : official journal of the American Society of Clinical Oncology*. 2003;21:2320-2325.
9. Arakelyan N, Berthou C, Desablens B, et al. Early versus late intensification for patients with high-risk Hodgkin lymphoma-3 cycles of intensive chemotherapy plus low-dose lymph node radiation therapy versus 4 cycles of combined doxorubicin, bleomycin, vinblastine, and dacarbazine plus myeloablative chemotherapy with autologous stem cell transplantation: five-year results of a randomized trial on behalf of the GOELAMS Group. *Cancer*. 2008;113:3323-3330.
10. Schmitz N, Pfistner B, Sextro M, et al. Aggressive conventional chemotherapy compared with high-dose chemotherapy with autologous haemopoietic stem-cell transplantation for relapsed chemosensitive Hodgkin's disease: a randomised trial. *Lancet*. 2002;359:2065-2071.
11. Smith SD, Moskowitz CH, Dean R, et al. Autologous stem cell transplant for early relapsed/refractory Hodgkin lymphoma: results from two transplant centres. *British journal of haematology*. 2011;153:358-363.
12. Lavoie JC, Connors JM, Phillips GL, et al. High-dose chemotherapy and autologous stem cell transplantation for primary refractory or relapsed Hodgkin lymphoma: long-term outcome in the first 100 patients treated in Vancouver. *Blood*. 2005;106:1473-1478.
13. Castagna L, Crocchiolo R, Giordano L, et al. High-dose melphalan with autologous stem cell support in refractory Hodgkin lymphoma patients as a bridge to second transplant. *Bone marrow transplantation*. 2015;50:499-504.

14. Hosing C, Saliba RM, Okoroji GJ, et al. High-dose chemotherapy and autologous hematopoietic progenitor cell transplantation for non-Hodgkin's lymphoma in patients >65 years of age. *Ann Oncol.* 2008;19:1166-1171.
15. Doocey RT, Toze CL, Connors JM, et al. Allogeneic haematopoietic stem-cell transplantation for relapsed and refractory aggressive histology non-Hodgkin lymphoma. *British journal of haematology.* 2005;131:223-230.
16. van Besien K, Carreras J, Bierman PJ, et al. Unrelated donor hematopoietic cell transplantation for non-hodgkin lymphoma: long-term outcomes. *Biology of blood and marrow transplantation : journal of the American Society for Blood and Marrow Transplantation.* 2009;15:554-563.
17. Devetten MP, Hari PN, Carreras J, et al. Unrelated donor reduced-intensity allogeneic hematopoietic stem cell transplantation for relapsed and refractory Hodgkin lymphoma. *Biology of blood and marrow transplantation : journal of the American Society for Blood and Marrow Transplantation.* 2009;15:109-117.
18. Sarina B, Castagna L, Farina L, et al. Allogeneic transplantation improves the overall and progression-free survival of Hodgkin lymphoma patients relapsing after autologous transplantation: a retrospective study based on the time of HLA typing and donor availability. *Blood.* 2010;115:3671-3677.
19. Castagna L, Sarina B, Todisco E, et al. Allogeneic stem cell transplantation compared with chemotherapy for poor-risk Hodgkin lymphoma. *Biology of blood and marrow transplantation : journal of the American Society for Blood and Marrow Transplantation.* 2009;15:432-438.
20. Claviez A, Canals C, Dierickx D, et al. Allogeneic hematopoietic stem cell transplantation in children and adolescents with recurrent and refractory Hodgkin lymphoma: an analysis of the European Group for Blood and Marrow Transplantation. *Blood.* 2009;114:2060-2067.
21. Schmitz N, Sureda A, Dini G, Claviez A, Lymphoma, Pediatric Diseases Working P. Allogeneic transplantation for children and adolescents with Hodgkin lymphoma. *Blood.* 2009;114:4605-4606.
22. Peggs KS, Sureda A, Qian W, et al. Reduced-intensity conditioning for allogeneic haematopoietic stem cell transplantation in relapsed and refractory Hodgkin lymphoma: impact of alemtuzumab and donor lymphocyte infusions on long-term outcomes. *British journal of haematology.* 2007;139:70-80.
23. Alvarez I, Sureda A, Caballero MD, et al. Nonmyeloablative stem cell transplantation is an effective therapy for refractory or relapsed hodgkin lymphoma: results of a spanish prospective cooperative protocol. *Biology of blood and marrow transplantation : journal of the American Society for Blood and Marrow Transplantation.* 2006;12:172-183.
24. Anderlini P, Saliba R, Acholonu S, et al. Fludarabine-melphalan as a preparative regimen for reduced-intensity conditioning allogeneic stem cell transplantation in relapsed and refractory Hodgkin's lymphoma: the updated M.D. Anderson Cancer Center experience. *Haematologica.* 2008;93:257-264.
25. Anderlini P, Saliba R, Acholonu S, et al. Reduced-intensity allogeneic stem cell transplantation in relapsed and refractory Hodgkin's disease: low transplant-related mortality and impact of intensity of conditioning regimen. *Bone marrow transplantation.* 2005;35:943-951.
26. Majhail NS, Weisdorf DJ, Wagner JE, Defor TE, Brunstein CG, Burns LJ. Comparable results of umbilical cord blood and HLA-matched sibling donor hematopoietic stem cell transplantation after reduced-intensity preparative regimen for advanced Hodgkin lymphoma. *Blood.* 2006;107:3804-3807.
27. Burroughs LM, O'Donnell PV, Sandmaier BM, et al. Comparison of outcomes of HLA-matched related, unrelated, or HLA-haploidentical related hematopoietic cell

- transplantation following nonmyeloablative conditioning for relapsed or refractory Hodgkin lymphoma. *Biology of blood and marrow transplantation : journal of the American Society for Blood and Marrow Transplantation*. 2008;14:1279-1287.
28. Marcais A, Porcher R, Robin M, et al. Impact of disease status and stem cell source on the results of reduced intensity conditioning transplant for Hodgkin's lymphoma: a retrospective study from the French Society of Bone Marrow Transplantation and Cellular Therapy (SFGM-TC). *Haematologica*. 2013;98:1467-1475.
  29. Sureda A, Canals C, Arranz R, et al. Allogeneic stem cell transplantation after reduced intensity conditioning in patients with relapsed or refractory Hodgkin's lymphoma. Results of the HDR-ALLO study - a prospective clinical trial by the Grupo Espanol de Linfomas/Trasplante de Medula Osea (GEL/TAMO) and the Lymphoma Working Party of the European Group for Blood and Marrow Transplantation. *Haematologica*. 2012;97:310-317.
  30. Horstmann K, Boumendil A, Finke J, et al. Second allo-SCT in patients with lymphoma relapse after a first allogeneic transplantation. A retrospective study of the EBMT Lymphoma Working Party. *Bone marrow transplantation*. 2015.
  31. Peniket AJ, Ruiz de Elvira MC, Taghipour G, et al. An EBMT registry matched study of allogeneic stem cell transplants for lymphoma: allogeneic transplantation is associated with a lower relapse rate but a higher procedure-related mortality rate than autologous transplantation. *Bone marrow transplantation*. 2003;31:667-678.
  32. Rodrigues CA, Sanz G, Brunstein CG, et al. Analysis of risk factors for outcomes after unrelated cord blood transplantation in adults with lymphoid malignancies: a study by the Eurocord-Netcord and lymphoma working party of the European group for blood and marrow transplantation. *Journal of clinical oncology : official journal of the American Society of Clinical Oncology*. 2009;27:256-263.
  33. Sureda A, Robinson S, Canals C, et al. Reduced-intensity conditioning compared with conventional allogeneic stem-cell transplantation in relapsed or refractory Hodgkin's lymphoma: an analysis from the Lymphoma Working Party of the European Group for Blood and Marrow Transplantation. *Journal of clinical oncology : official journal of the American Society of Clinical Oncology*. 2008;26:455-462.

## Plasmablastic lymphoma

1. Castillo JJ, Bibas M, Miranda RN. The biology and treatment of plasmablastic lymphoma. *Blood*. 2015;125:2323-2330.
2. Al-Malki MM, Castillo JJ, Sloan JM, Re A. Hematopoietic cell transplantation for plasmablastic lymphoma: a review. *Biology of blood and marrow transplantation : journal of the American Society for Blood and Marrow Transplantation*. 2014;20:1877-1884.
3. Castillo JJ, Reagan JL. Plasmablastic lymphoma: a systematic review. *ScientificWorldJournal*. 2011;11:687-696.
4. Balsalobre P, Diez-Martin JL, Re A, et al. Autologous stem-cell transplantation in patients with HIV-related lymphoma. *Journal of clinical oncology : official journal of the American Society of Clinical Oncology*. 2009;27:2192-2198.
5. Diez-Martin JL, Balsalobre P, Re A, et al. Comparable survival between HIV+ and HIV-non-Hodgkin and Hodgkin lymphoma patients undergoing autologous peripheral blood stem cell transplantation. *Blood*. 2009;113:6011-6014.

## Burkitt's lymphoma

1. NCCN clinical practice guidelines in oncology (NCCN guidelines). Non-Hodgkin's lymphomas. Version 2.2015. Available at [www.nccn.org](http://www.nccn.org) (accessed 05/01/2015).
2. Maramattom LV, Hari PN, Burns LJ, et al. Autologous and allogeneic transplantation for Burkitt lymphoma: outcomes and changes in utilization: a report from the center for international blood and marrow transplant research. *Biology of blood and marrow transplantation : journal of the American Society for Blood and Marrow Transplantation*. 2013;19:173-179.
3. Song KW, Barnett MJ, Gascoyne RD, et al. Haematopoietic stem cell transplantation as primary therapy of sporadic adult Burkitt lymphoma. *British journal of haematology*. 2006;133:634-637.
4. van Imhoff GW, van der Holt B, MacKenzie MA, et al. Short intensive sequential therapy followed by autologous stem cell transplantation in adult Burkitt, Burkitt-like and lymphoblastic lymphoma. *Leukemia*. 2005;19:945-952.
5. Peniket AJ, Ruiz de Elvira MC, Taghipour G, et al. An EBMT registry matched study of allogeneic stem cell transplants for lymphoma: allogeneic transplantation is associated with a lower relapse rate but a higher procedure-related mortality rate than autologous transplantation. *Bone marrow transplantation*. 2003;31:667-678.
6. Krishnan A, Molina A, Zaia J, et al. Durable remissions with autologous stem cell transplantation for high-risk HIV-associated lymphomas. *Blood*. 2005;105:874-878.
7. Krishnan A, Palmer JM, Zaia JA, Tsai NC, Alvarnas J, Forman SJ. HIV status does not affect the outcome of autologous stem cell transplantation (ASCT) for non-Hodgkin lymphoma (NHL). *Biology of blood and marrow transplantation : journal of the American Society for Blood and Marrow Transplantation*. 2010;16:1302-1308.
8. Chen YB, Lane AA, Logan BR, et al. Impact of conditioning regimen on outcomes for patients with lymphoma undergoing high-dose therapy with autologous hematopoietic cell transplantation. *Biology of blood and marrow transplantation : journal of the American Society for Blood and Marrow Transplantation*. 2015;21:1046-1053.
9. van Besien K, Carreras J, Bierman PJ, et al. Unrelated donor hematopoietic cell transplantation for non-Hodgkin lymphoma: long-term outcomes. *Biology of blood and marrow transplantation : journal of the American Society for Blood and Marrow Transplantation*. 2009;15:554-563.
10. Dahi PB, Tamari R, Devlin SM, et al. Favorable outcomes in elderly patients undergoing high-dose therapy and autologous stem cell transplantation for non-Hodgkin lymphoma. *Biology of blood and marrow transplantation : journal of the American Society for Blood and Marrow Transplantation*. 2014;20:2004-2009.

## Lymphoplasmacytic lymphoma

1. NCCN clinical practice guidelines in oncology (NCCN guidelines). Non-Hodgkin's lymphomas. Version 2.2015. Available at [www.nccn.org](http://www.nccn.org) (accessed 05/01/2015).
2. Kyriakou C, Canals C, Sibon D, et al. High-dose therapy and autologous stem-cell transplantation in Waldenstrom macroglobulinemia: the Lymphoma Working Party of the European Group for Blood and Marrow Transplantation. *Journal of clinical oncology : official journal of the American Society of Clinical Oncology*. 2010;28:2227-2232.
3. Garnier A, Robin M, Larosa F, et al. Allogeneic hematopoietic stem cell transplantation allows long-term complete remission and curability in high-risk Waldenstrom's macroglobulinemia. Results of a retrospective analysis of the Societe Francaise de Greffe de Moelle et de Therapie Cellulaire. *Haematologica*. 2010;95:950-955.
4. Caravita T, Siniscalchi A, Tendas A, et al. High-dose therapy with autologous PBSC transplantation in the front-line treatment of Waldenstrom's macroglobulinemia. *Bone marrow transplantation*. 2009;43:587-588.
5. Stakiw J, Kim DH, Kuruvilla J, Gupta V, Messner H, Lipton JH. Evidence of graft-versus-Waldenstrom's macroglobulinaemia effect after allogeneic stem cell transplantation: a single centre experience. *Bone marrow transplantation*. 2007;40:369-372.
6. Anagnostopoulos A, Hari PN, Perez WS, et al. Autologous or allogeneic stem cell transplantation in patients with Waldenstrom's macroglobulinemia. *Biology of blood and marrow transplantation : journal of the American Society for Blood and Marrow Transplantation*. 2006;12:845-854.
7. Tournilhac O, Leblond V, Tabrizi R, et al. Transplantation in Waldenstrom's macroglobulinemia--the French experience. *Semin Oncol*. 2003;30:291-296.
8. Anagnostopoulos A, Aleman A, Giralt S. Autologous and allogeneic stem cell transplantation in Waldenstrom's macroglobulinemia: review of the literature and future directions. *Semin Oncol*. 2003;30:286-290.
9. Anagnostopoulos A, Dimopoulos MA, Aleman A, et al. High-dose chemotherapy followed by stem cell transplantation in patients with resistant Waldenstrom's macroglobulinemia. *Bone marrow transplantation*. 2001;27:1027-1029.
10. Tarella C, Arcaini L, Baldini L, et al. Italian Society of Hematology, Italian Society of Experimental Hematology, and Italian Group for Bone Marrow Transplantation guidelines for the management of indolent, nonfollicular B-cell lymphoma (marginal zone, lymphoplasmacytic, and small lymphocytic lymphoma). *Clinical lymphoma, myeloma & leukemia*. 2015;15:75-85.
11. Gilleece MH, Pearce R, Linch DC, et al. The outcome of haemopoietic stem cell transplantation in the treatment of lymphoplasmacytic lymphoma in the UK: a British Society Bone Marrow Transplantation study. *Hematology*. 2008;13:119-127.
12. Kyriakou C, Canals C, Cornelissen JJ, et al. Allogeneic stem-cell transplantation in patients with Waldenstrom macroglobulinemia: report from the Lymphoma Working Party of the European Group for Blood and Marrow Transplantation. *Journal of clinical oncology : official journal of the American Society of Clinical Oncology*. 2010;28:4926-4934.

## Plasma cell disorders

1. Shah N, Callander N, Ganguly S, et al. Hematopoietic Stem Cell Transplantation for Multiple Myeloma: Guidelines from the American Society for Blood and Marrow Transplantation. *Biology of blood and marrow transplantation : journal of the American Society for Blood and Marrow Transplantation*. 2015.
2. NCCN clinical practice guidelines in oncology (NCCN guidelines). Multiple myeloma. Version 4.2015. Available at [www.nccn.org](http://www.nccn.org) (accessed 05/01/2015).
3. NCCN clinical practice guidelines in oncology (NCCN guidelines). Waldenstrom's macroglobulinemia/Lymphoplasmacytic lymphoma. Version 3.2015. Available at [www.nccn.org](http://www.nccn.org) (accessed 05/01/2015)
4. NCCN clinical practice guidelines in oncology (NCCN guidelines). Systemic light chain amyloidosis. Version 1.2015. Available at [www.nccn.org](http://www.nccn.org) (accessed 05/01/2015)
5. Koreth J, Cutler CS, Djulbegovic B, et al. High-dose therapy with single autologous transplantation versus chemotherapy for newly diagnosed multiple myeloma: A systematic review and meta-analysis of randomized controlled trials. *Biology of blood and marrow transplantation : journal of the American Society for Blood and Marrow Transplantation*. 2007;13:183-196.
6. Kumar A, Kharfan-Dabaja MA, Glasmacher A, Djulbegovic B. Tandem versus single autologous hematopoietic cell transplantation for the treatment of multiple myeloma: a systematic review and meta-analysis. *J Natl Cancer Inst*. 2009;101:100-106.
7. Michaelis LC, Saad A, Zhong X, et al. Salvage second hematopoietic cell transplantation in myeloma. *Biology of blood and marrow transplantation : journal of the American Society for Blood and Marrow Transplantation*. 2013;19:760-766.
8. Gonsalves WI, Gertz MA, Lacy MQ, et al. Second auto-SCT for treatment of relapsed multiple myeloma. *Bone marrow transplantation*. 2013;48:568-573.
9. Jimenez-Zepeda VH, Mikhael J, Winter A, et al. Second autologous stem cell transplantation as salvage therapy for multiple myeloma: impact on progression-free and overall survival. *Biology of blood and marrow transplantation : journal of the American Society for Blood and Marrow Transplantation*. 2012;18:773-779.
10. Qazilbash MH, Saliba R, De Lima M, et al. Second autologous or allogeneic transplantation after the failure of first autograft in patients with multiple myeloma. *Cancer*. 2006;106:1084-1089.
11. Cook G, Williams C, Brown JM, et al. High-dose chemotherapy plus autologous stem-cell transplantation as consolidation therapy in patients with relapsed multiple myeloma after previous autologous stem-cell transplantation (NCRI Myeloma X Relapse [Intensive trial]): a randomised, open-label, phase 3 trial. *Lancet Oncol*. 2014;15:874-885.
12. Armeson KE, Hill EG, Costa LJ. Tandem autologous vs autologous plus reduced intensity allogeneic transplantation in the upfront management of multiple myeloma: meta-analysis of trials with biological assignment. *Bone marrow transplantation*. 2013;48:562-567.
13. Kharfan-Dabaja MA, Hamadani M, Reljic T, et al. Comparative efficacy of tandem autologous versus autologous followed by allogeneic hematopoietic cell transplantation in patients with newly diagnosed multiple myeloma: a systematic review and meta-analysis of randomized controlled trials. *J Hematol Oncol*. 2013;6:2.
14. Donato ML, Siegel DS, Vesole DH, et al. The graft-versus-myeloma effect: chronic graft-versus-host disease but not acute graft-versus-host disease prolongs survival in patients with multiple myeloma receiving allogeneic transplantation. *Biology of blood and marrow transplantation : journal of the American Society for Blood and Marrow Transplantation*. 2014;20:1211-1216.

15. Freytes CO, Vesole DH, LeRademacher J, et al. Second transplants for multiple myeloma relapsing after a previous autotransplant-reduced-intensity allogeneic vs autologous transplantation. *Bone marrow transplantation*. 2014;49:416-421.
16. Bashir Q, Khan H, Orlowski RZ, et al. Predictors of prolonged survival after allogeneic hematopoietic stem cell transplantation for multiple myeloma. *Am J Hematol*. 2012;87:272-276.
17. Mahindra A, Kalaycio ME, Vela-Ojeda J, et al. Hematopoietic cell transplantation for primary plasma cell leukemia: results from the Center for International Blood and Marrow Transplant Research. *Leukemia*. 2012;26:1091-1097.

## Chronic lymphocytic leukemia and pro-lymphocytic leukemia

1. Cwynarski K, van Biezen A, de Wreede L, et al. Autologous and allogeneic stem-cell transplantation for transformed chronic lymphocytic leukemia (Richter's syndrome): A retrospective analysis from the chronic lymphocytic leukemia subcommittee of the chronic leukemia working party and lymphoma working party of the European Group for Blood and Marrow Transplantation. *Journal of clinical oncology : official journal of the American Society of Clinical Oncology*. 2012;30:2211-2217.
2. Rodrigues CA, Sanz G, Brunstein CG, et al. Analysis of risk factors for outcomes after unrelated cord blood transplantation in adults with lymphoid malignancies: a study by the Eurocord-Netcord and lymphoma working party of the European group for blood and marrow transplantation. *Journal of clinical oncology : official journal of the American Society of Clinical Oncology*. 2009;27:256-263.
3. Michallet M, Sobh M, Milligan D, et al. The impact of HLA matching on long-term transplant outcome after allogeneic hematopoietic stem cell transplantation for CLL: a retrospective study from the EBMT registry. *Leukemia*. 2010;24:1725-1731.
4. Peres E, Braun T, Krijanovski O, et al. Reduced intensity versus full myeloablative stem cell transplant for advanced CLL. *Bone marrow transplantation*. 2009;44:579-583.
5. Kharfan-Dabaja MA, Pidala J, Kumar A, Terasawa T, Djulbegovic B. Comparing efficacy of reduced-toxicity allogeneic hematopoietic cell transplantation with conventional chemo-(immuno) therapy in patients with relapsed or refractory CLL: a Markov decision analysis. *Bone marrow transplantation*. 2012;47:1164-1170.
6. Dreger P, Dohner H, McClanahan F, et al. Early autologous stem cell transplantation for chronic lymphocytic leukemia: long-term follow-up of the German CLL Study Group CLL3 trial. *Blood*. 2012;119:4851-4859.
7. Brion A, Mahe B, Kolb B, et al. Autologous transplantation in CLL patients with B and C Binet stages: final results of the prospective randomized GOELAMS LLC 98 trial. *Bone marrow transplantation*. 2012;47:542-548.
8. Dreger P, Dohner H, Ritgen M, et al. Allogeneic stem cell transplantation provides durable disease control in poor-risk chronic lymphocytic leukemia: long-term clinical and MRD results of the German CLL Study Group CLL3X trial. *Blood*. 2010;116:2438-2447.
9. Guillaume T, Beguin Y, Tabrizi R, et al. Allogeneic hematopoietic stem cell transplantation for T-prolymphocytic leukemia: a report from the French society for stem cell transplantation (SFGM-TC). *European journal of haematology*. 2015;94:265-269.
10. Wiktor-Jedrzejczak W, Dearden C, de Wreede L, et al. Hematopoietic stem cell transplantation in T-prolymphocytic leukemia: a retrospective study from the European Group for Blood and Marrow Transplantation and the Royal Marsden Consortium. *Leukemia*. 2012;26:972-976.
11. Krishnan B, Else M, Tjonnfjord GE, et al. Stem cell transplantation after alemtuzumab in T-cell prolymphocytic leukaemia results in longer survival than after alemtuzumab alone: a multicentre retrospective study. *British journal of haematology*. 2010;149:907-910.
12. Kalaycio ME, Kukreja M, Woolfrey AE, et al. Allogeneic hematopoietic cell transplant for prolymphocytic leukemia. *Biology of blood and marrow transplantation : journal of the American Society for Blood and Marrow Transplantation*. 2010;16:543-547.
13. McClune BL, Defor T, Brunstein C, et al. Reduced intensity allogeneic haematopoietic cell transplantation for chronic lymphocytic leukaemia: related donor and umbilical cord allografting. *British journal of haematology*. 2012;156:273-275.

## Germ cell tumors

1. Lorch A, Kleinhans A, Kramar A, et al. Sequential versus single high-dose chemotherapy in patients with relapsed or refractory germ cell tumors: long-term results of a prospective randomized trial. *Journal of clinical oncology : official journal of the American Society of Clinical Oncology*. 2012;30:800-805.
2. Lorch A, Bascoul-Mollevi C, Kramar A, et al. Conventional-dose versus high-dose chemotherapy as first salvage treatment in male patients with metastatic germ cell tumors: evidence from a large international database. *Journal of clinical oncology : official journal of the American Society of Clinical Oncology*. 2011;29:2178-2184.
3. Selle F, Wittnebel S, Biron P, et al. A phase II trial of high-dose chemotherapy (HDCT) supported by hematopoietic stem-cell transplantation (HSCT) in germ-cell tumors (GCTs) patients failing cisplatin-based chemotherapy: the Multicentric TAXIF II study. *Ann Oncol*. 2014;25:1775-1782.
4. Beausoleil M, Ernst DS, Stitt L, Winquist E. Consolidative high-dose chemotherapy after conventional-dose chemotherapy as first salvage treatment for male patients with metastatic germ cell tumours. *Can Urol Assoc J*. 2012;6:111-116.
5. Reddy Ammakkanavar N, Matei D, Abonour R, Einhorn LH. High-dose chemotherapy for recurrent ovarian germ cell tumors. *Journal of clinical oncology : official journal of the American Society of Clinical Oncology*. 2015;33:226-227.
6. Suleiman Y, Siddiqui BK, Brames MJ, Abonour R, Einhorn LH. Salvage therapy with high-dose chemotherapy and peripheral blood stem cell transplant in patients with primary mediastinal nonseminomatous germ cell tumors. *Biology of blood and marrow transplantation : journal of the American Society for Blood and Marrow Transplantation*. 2013;19:161-163.
7. Schmoll HJ, Osanto S, Kawai K, Einhorn L, Fizazi K. Advanced seminoma and nonseminoma: SIU/ICUD Consensus Meeting on Germ Cell Tumors (GCT), Shanghai 2009. *Urology*. 2011;78:S456-468.
8. Einhorn LH, Williams SD, Chamness A, Brames MJ, Perkins SM, Abonour R. High-dose chemotherapy and stem-cell rescue for metastatic germ-cell tumors. *The New England journal of medicine*. 2007;357:340-348.
9. Vaena DA, Abonour R, Einhorn LH. Long-term survival after high-dose salvage chemotherapy for germ cell malignancies with adverse prognostic variables. *Journal of clinical oncology : official journal of the American Society of Clinical Oncology*. 2003;21:4100-4104.

## Solid tumors (other than germ cell tumors)

1. Diaz MA, Lassaletta A, Perez A, Sevilla J, Madero L, Gonzalez-Vicent M. High-dose busulfan and melphalan as conditioning regimen for autologous peripheral blood progenitor cell transplantation in high-risk ewing sarcoma patients: a long-term follow-up single-center study. *Pediatr Hematol Oncol.* 2010;27:272-282.
2. Lashkari A, Chow WA, Valdes F, et al. Tandem high-dose chemotherapy followed by autologous transplantation in patients with locally advanced or metastatic sarcoma. *Anticancer Res.* 2009;29:3281-3288.
3. Engelhardt M, Zeiser R, Ihorst G, Finke J, Muller CI. High-dose chemotherapy and autologous peripheral blood stem cell transplantation in adult patients with high-risk or advanced Ewing and soft tissue sarcoma. *J Cancer Res Clin Oncol.* 2007;133:1-11.
4. Al-Faris N, Al Harbi T, Goia C, Pappo A, Doyle J, Gassas A. Does consolidation with autologous stem cell transplantation improve the outcome of children with metastatic or relapsed Ewing sarcoma? *Pediatr Blood Cancer.* 2007;49:190-195.
5. Fraser CJ, Weigel BJ, Perentesis JP, et al. Autologous stem cell transplantation for high-risk Ewing's sarcoma and other pediatric solid tumors. *Bone marrow transplantation.* 2006;37:175-181.
6. Kozuka T, Kiura K, Katayama H, et al. Tandem high-dose chemotherapy supported by autologous peripheral blood stem cell transplantation for recurrent soft tissue sarcoma. *Anticancer Res.* 2002;22:2939-2944.
7. Blay JY, Bouhour D, Ray-Coquard I, Dumontet C, Philip T, Biron P. High-dose chemotherapy with autologous hematopoietic stem-cell transplantation for advanced soft tissue sarcoma in adults. *Journal of clinical oncology : official journal of the American Society of Clinical Oncology.* 2000;18:3643-3650.
8. Lee JW, Kim H, Kang HJ, et al. Clinical characteristics and treatment results of pediatric osteosarcoma: the role of high dose chemotherapy with autologous stem cell transplantation. *Cancer Res Treat.* 2008;40:172-177.
9. Arpacı F, Ataergin S, Ozet A, et al. The feasibility of neoadjuvant high-dose chemotherapy and autologous peripheral blood stem cell transplantation in patients with nonmetastatic high grade localized osteosarcoma: results of a phase II study. *Cancer.* 2005;104:1058-1065.
10. Kounami S, Nakayama K, Yoshiyama M, Yoshimasu T, Aoyagi N, Yoshikawa N. Non-myeloablative allogeneic peripheral blood stem cell transplantation in a patient with refractory osteosarcoma. *Pediatr Transplant.* 2005;9:342-345.
11. Fagioli F, Berger M, Brach del Prever A, et al. Regression of metastatic osteosarcoma following non-myeloablative stem cell transplantation. A case report. *Haematologica.* 2003;88:ECR16.
12. Sauerbrey A, Bielack S, Kempf-Bielack B, Zoubek A, Paulussen M, Zintl F. High-dose chemotherapy (HDC) and autologous hematopoietic stem cell transplantation (ASCT) as salvage therapy for relapsed osteosarcoma. *Bone marrow transplantation.* 2001;27:933-937.
13. Granger M, Grupp SA, Kletzel M, et al. Feasibility of a tandem autologous peripheral blood stem cell transplant regimen for high risk neuroblastoma in a cooperative group setting: a Pediatric Oncology Group study: a report from the Children's Oncology Group. *Pediatr Blood Cancer.* 2012;59:902-907.
14. Hobbie WL, Moshang T, Carlson CA, et al. Late effects in survivors of tandem peripheral blood stem cell transplant for high-risk neuroblastoma. *Pediatr Blood Cancer.* 2008;51:679-683.
15. Grupp SA, Stern JW, Bunin N, et al. Rapid-sequence tandem transplant for children with high-risk neuroblastoma. *Med Pediatr Oncol.* 2000;35:696-700.

16. Soni S, Pai V, Gross TG, Ranalli M. Busulfan and melphalan as consolidation therapy with autologous peripheral blood stem cell transplantation following Children's Oncology Group (COG) induction platform for high-risk neuroblastoma: early results from a single institution. *Pediatr Transplant*. 2014;18:217-220.
17. Kreissman SG, Seeger RC, Matthay KK, et al. Purged versus non-purged peripheral blood stem-cell transplantation for high-risk neuroblastoma (COG A3973): a randomised phase 3 trial. *Lancet Oncol*. 2013;14:999-1008.
18. Hale GA, Arora M, Ahn KW, et al. Allogeneic hematopoietic cell transplantation for neuroblastoma: the CIBMTR experience. *Bone marrow transplantation*. 2013;48:1056-1064.
19. MA DEI, Contoli B, Jenkner A, et al. Comparison of two different conditioning regimens before autologous transplantation for children with high-risk neuroblastoma. *Anticancer Res*. 2012;32:5527-5533.
20. French S, DuBois SG, Horn B, et al. 131I-MIBG followed by consolidation with busulfan, melphalan and autologous stem cell transplantation for refractory neuroblastoma. *Pediatr Blood Cancer*. 2013;60:879-884.
21. Sung KW, Son MH, Lee SH, et al. Tandem high-dose chemotherapy and autologous stem cell transplantation in patients with high-risk neuroblastoma: results of SMC NB-2004 study. *Bone marrow transplantation*. 2013;48:68-73.
22. Saarinen-Pihkala UM, Hovi L, Koivusalo A, et al. Thiotepa and melphalan based single, tandem, and triple high dose therapy and autologous stem cell transplantation for high risk neuroblastoma. *Pediatr Blood Cancer*. 2012;59:1190-1197.
23. Sung KW, Park JE, Chueh HW, et al. Reduced-intensity allogeneic stem cell transplantation for children with neuroblastoma who failed tandem autologous stem cell transplantation. *Pediatr Blood Cancer*. 2011;57:660-665.
24. Molina B, Alonso L, Gonzalez-Vicent M, et al. High-dose busulfan and melphalan as conditioning regimen for autologous peripheral blood progenitor cell transplantation in high-risk neuroblastoma patients. *Pediatr Hematol Oncol*. 2011;28:115-123.
25. Toporski J, Garkavij M, Tennvall J, et al. High-dose iodine-131-metaiodobenzylguanidine with haploidentical stem cell transplantation and posttransplant immunotherapy in children with relapsed/refractory neuroblastoma. *Biology of blood and marrow transplantation : journal of the American Society for Blood and Marrow Transplantation*. 2009;15:1077-1085.
26. George RE, Li S, Medeiros-Nancarrow C, et al. High-risk neuroblastoma treated with tandem autologous peripheral-blood stem cell-supported transplantation: long-term survival update. *Journal of clinical oncology : official journal of the American Society of Clinical Oncology*. 2006;24:2891-2896.
27. Morimoto T, Matsufuji H, Yokomori K, Hosoya R. Successful second autologous peripheral blood stem cell transplantation conditioned with total body irradiation for progressive neuroblastoma after recurrence. *Tokai J Exp Clin Med*. 2006;31:154-156.
28. Valteau-Couanet D, Benhamou E, Vassal G, et al. Consolidation with a busulfan-containing regimen followed by stem cell transplantation in infants with poor prognosis stage 4 neuroblastoma. *Bone marrow transplantation*. 2000;25:937-942.
29. Berghold G, El Kababri M, Varlet P, et al. High-dose busulfan-thiotepa with autologous stem cell transplantation followed by posterior fossa irradiation in young children with classical or incompletely resected medulloblastoma. *Pediatr Blood Cancer*. 2014;61:907-912.
30. Sung KW, Lim do H, Son MH, et al. Reduced-dose craniospinal radiotherapy followed by tandem high-dose chemotherapy and autologous stem cell transplantation in patients with high-risk medulloblastoma. *Neuro Oncol*. 2013;15:352-359.

31. Park JE, Kang J, Yoo KH, et al. Efficacy of high-dose chemotherapy and autologous stem cell transplantation in patients with relapsed medulloblastoma: a report on the Korean Society for Pediatric Neuro-Oncology (KSPNO)-S-053 study. *J Korean Med Sci.* 2010;25:1160-1166.
32. Aihara Y, Tsuruta T, Kawamata T, et al. Double high-dose chemotherapy followed by autologous peripheral blood stem cell transplantation for primary disseminated medulloblastoma: a report of 3 cases. *J Pediatr Hematol Oncol.* 2010;32:e70-74.
33. Valteau-Couanet D, Fillipini B, Benhamou E, et al. High-dose busulfan and thiotepa followed by autologous stem cell transplantation (ASCT) in previously irradiated medulloblastoma patients: high toxicity and lack of efficacy. *Bone marrow transplantation.* 2005;36:939-945.
34. Presson A, Moore TB, Kempert P. Efficacy of high-dose chemotherapy and autologous stem cell transplant for recurrent Wilms' tumor: a meta-analysis. *J Pediatr Hematol Oncol.* 2010;32:454-461.
35. Illhardt T, Ebinger M, Schwarze CP, et al. Children with relapsed or refractory nephroblastoma: favorable long-term survival after high-dose chemotherapy and autologous stem cell transplantation. *Klin Padiatr.* 2014;226:351-356.
36. Ha TC, Spreafico F, Graf N, et al. An international strategy to determine the role of high dose therapy in recurrent Wilms' tumour. *Eur J Cancer.* 2013;49:194-210.

## Severe aplastic anemia

1. Deeg HJ, O'Donnell M, Tolar J, et al. Optimization of conditioning for marrow transplantation from unrelated donors for patients with aplastic anemia after failure of immunosuppressive therapy. *Blood*. 2006;108:1485-1491.
2. Perez-Albuerne ED, Eapen M, Klein J, et al. Outcome of unrelated donor stem cell transplantation for children with severe aplastic anemia. *British journal of haematology*. 2008;141:216-223.
3. Eapen M, Le Rademacher J, Antin JH, et al. Effect of stem cell source on outcomes after unrelated donor transplantation in severe aplastic anemia. *Blood*. 2011;118:2618-2621.
4. Sangiolo D, Storb R, Deeg HJ, et al. Outcome of allogeneic hematopoietic cell transplantation from HLA-identical siblings for severe aplastic anemia in patients over 40 years of age. *Biology of blood and marrow transplantation : journal of the American Society for Blood and Marrow Transplantation*. 2010;16:1411-1418.
5. Storb R, Blume KG, O'Donnell MR, et al. Cyclophosphamide and antithymocyte globulin to condition patients with aplastic anemia for allogeneic marrow transplantations: the experience in four centers. *Biology of blood and marrow transplantation : journal of the American Society for Blood and Marrow Transplantation*. 2001;7:39-44.
6. Yoshida N, Kobayashi R, Yabe H, et al. First-line treatment for severe aplastic anemia in children: bone marrow transplantation from a matched family donor versus immunosuppressive therapy. *Haematologica*. 2014;99:1784-1791.
7. Yagasaki H, Kojima S, Yabe H, et al. Acceptable HLA-mismatching in unrelated donor bone marrow transplantation for patients with acquired severe aplastic anemia. *Blood*. 2011;118:3186-3190.
8. Yagasaki H, Takahashi Y, Hama A, et al. Comparison of matched-sibling donor BMT and unrelated donor BMT in children and adolescent with acquired severe aplastic anemia. *Bone marrow transplantation*. 2010;45:1508-1513.
9. Kosaka Y, Yagasaki H, Sano K, et al. Prospective multicenter trial comparing repeated immunosuppressive therapy with stem-cell transplantation from an alternative donor as second-line treatment for children with severe and very severe aplastic anemia. *Blood*. 2008;111:1054-1059.
10. Yagasaki H, Takahashi Y, Kudo K, et al. Feasibility and results of bone marrow transplantation from an HLA-mismatched unrelated donor for children and young adults with acquired severe aplastic anemia. *Int J Hematol*. 2007;85:437-442.
11. Bacigalupo A, Socie G, Hamladji RM, et al. Current outcome of HLA identical sibling vs. unrelated donor transplants in severe aplastic anemia: an EBMT analysis. *Haematologica*. 2015.
12. Bacigalupo A, Socie G, Schrezenmeier H, et al. Bone marrow versus peripheral blood as the stem cell source for sibling transplants in acquired aplastic anemia: survival advantage for bone marrow in all age groups. *Haematologica*. 2012;97:1142-1148.
13. Maury S, Bacigalupo A, Anderlini P, et al. Improved outcome of patients older than 30 years receiving HLA-identical sibling hematopoietic stem cell transplantation for severe acquired aplastic anemia using fludarabine-based conditioning: a comparison with conventional conditioning regimen. *Haematologica*. 2009;94:1312-1315.
14. Viollier R, Socie G, Tichelli A, et al. Recent improvement in outcome of unrelated donor transplantation for aplastic anemia. *Bone marrow transplantation*. 2008;41:45-50.
15. Locasciulli A, Oneto R, Bacigalupo A, et al. Outcome of patients with acquired aplastic anemia given first line bone marrow transplantation or immunosuppressive treatment in the last decade: a report from the European Group for Blood and Marrow Transplantation (EBMT). *Haematologica*. 2007;92:11-18.

16. Bacigalupo A, Locatelli F, Lanino E, et al. Fludarabine, cyclophosphamide and anti-thymocyte globulin for alternative donor transplants in acquired severe aplastic anemia: a report from the EBMT-SAA Working Party. *Bone marrow transplantation*. 2005;36:947-950.
17. Bacigalupo A, Oneto R, Bruno B, et al. Current results of bone marrow transplantation in patients with acquired severe aplastic anemia. Report of the European Group for Blood and Marrow transplantation. On behalf of the Working Party on Severe Aplastic Anemia of the European Group for Blood and Marrow Transplantation. *Acta Haematol*. 2000;103:19-25.
18. Korthof ET, Bekassy AN, Hussein AA. Management of acquired aplastic anemia in children. *Bone marrow transplantation*. 2013;48:191-195.

## Sickle cell disease

1. Angelucci E, Matthes-Martin S, Baronciani D, et al. Hematopoietic stem cell transplantation in thalassemia major and sickle cell disease: indications and management recommendations from an international expert panel. *Haematologica*. 2014;99:811-820.
2. King A, Shenoy S. Evidence-based focused review of the status of hematopoietic stem cell transplantation as treatment of sickle cell disease and thalassemia. *Blood*. 2014;123:3089-3094; quiz 3210.
3. Panepinto JA, Walters MC, Carreras J, et al. Matched-related donor transplantation for sickle cell disease: report from the Center for International Blood and Transplant Research. *British journal of haematology*. 2007;137:479-485.
4. Horan JT, Haight A, Dioguardi JL, et al. Using fludarabine to reduce exposure to alkylating agents in children with sickle cell disease receiving busulfan, cyclophosphamide, and antithymocyte globulin transplant conditioning: results of a dose de-escalation trial. *Biology of blood and marrow transplantation : journal of the American Society for Blood and Marrow Transplantation*. 2015;21:900-905.
5. Kamani NR, Walters MC, Carter S, et al. Unrelated donor cord blood transplantation for children with severe sickle cell disease: results of one cohort from the phase II study from the Blood and Marrow Transplant Clinical Trials Network (BMT CTN). *Biology of blood and marrow transplantation : journal of the American Society for Blood and Marrow Transplantation*. 2012;18:1265-1272.
6. Majumdar S, Robertson Z, Robinson A, Starnes S, Iyer R, Megason G. Outcome of hematopoietic cell transplantation in children with sickle cell disease, a single center's experience. *Bone marrow transplantation*. 2010;45:895-900.
7. Bernaudin F, Socie G, Kuentz M, et al. Long-term results of related myeloablative stem-cell transplantation to cure sickle cell disease. *Blood*. 2007;110:2749-2756.
8. Hsieh MM, Kang EM, Fitzhugh CD, et al. Allogeneic hematopoietic stem-cell transplantation for sickle cell disease. *The New England journal of medicine*. 2009;361:2309-2317.
9. Ruggeri A, Eapen M, Scaravadou A, et al. Umbilical cord blood transplantation for children with thalassemia and sickle cell disease. *Biology of blood and marrow transplantation : journal of the American Society for Blood and Marrow Transplantation*. 2011;17:1375-1382.
10. Locatelli F, Rocha V, Reed W, et al. Related umbilical cord blood transplantation in patients with thalassemia and sickle cell disease. *Blood*. 2003;101:2137-2143.
11. McPherson ME, Hutcherson D, Olson E, Haight AE, Horan J, Chiang KY. Safety and efficacy of targeted busulfan therapy in children undergoing myeloablative matched sibling donor BMT for sickle cell disease. *Bone marrow transplantation*. 2011;46:27-33.
12. Arnold SD, Jin Z, Sands S, Bhatia M, Kung AL, Satwani P. Allogeneic Hematopoietic Cell Transplantation for Children with Sickle Cell Disease Is Beneficial and Cost-Effective: A Single-Center Analysis. *Biology of blood and marrow transplantation : journal of the American Society for Blood and Marrow Transplantation*. 2015.
13. Soni S, Gross TG, Rangarajan H, Baker KS, Sturm M, Rhodes M. Outcomes of matched sibling donor hematopoietic stem cell transplantation for severe sickle cell disease with myeloablative conditioning and intermediate-dose of rabbit anti-thymocyte globulin. *Pediatr Blood Cancer*. 2014;61:1685-1689.
14. Krishnamurti L, Kharbanda S, Biernacki MA, et al. Stable long-term donor engraftment following reduced-intensity hematopoietic cell transplantation for sickle cell disease. *Biology of blood and marrow transplantation : journal of the American Society for Blood and Marrow Transplantation*. 2008;14:1270-1278.

15. Bolanos-Meade J, Fuchs EJ, Luznik L, et al. HLA-haploidentical bone marrow transplantation with posttransplant cyclophosphamide expands the donor pool for patients with sickle cell disease. *Blood*. 2012;120:4285-4291.

## Thalassemia

1. Angelucci E, Matthes-Martin S, Baronciani D, et al. Hematopoietic stem cell transplantation in thalassemia major and sickle cell disease: indications and management recommendations from an international expert panel. *Haematologica*. 2014;99:811-820.
2. King A, Shenoy S. Evidence-based focused review of the status of hematopoietic stem cell transplantation as treatment of sickle cell disease and thalassemia. *Blood*. 2014;123:3089-3094; quiz 3210.
3. Mathews V, George B, Viswabandya A, et al. Improved clinical outcomes of high risk beta thalassemia major patients undergoing a HLA matched related allogeneic stem cell transplant with a treosulfan based conditioning regimen and peripheral blood stem cell grafts. *PLoS one*. 2013;8:e61637.
4. Rajasekar R, Mathews V, Lakshmi KM, et al. Cellular immune reconstitution and its impact on clinical outcome in children with beta thalassemia major undergoing a matched related myeloablative allogeneic bone marrow transplant. *Biology of blood and marrow transplantation : journal of the American Society for Blood and Marrow Transplantation*. 2009;15:597-609.
5. La Nasa G, Argioli F, Giardini C, et al. Unrelated bone marrow transplantation for beta-thalassemia patients: The experience of the Italian Bone Marrow Transplant Group. *Ann N Y Acad Sci*. 2005;1054:186-195.
6. Ramzi M, Nourani H, Zakernia M, Hamidian Jahromi AR. Hematopoietic stem cell transplantation for beta-thalassemia major: experience in south of Iran. *Transplant Proc*. 2004;36:2509-2510.
7. Anurathapan U, Pakakasama S, Mekjaruskul P, et al. Outcomes of thalassemia patients undergoing hematopoietic stem cell transplantation by using a standard myeloablative versus a novel reduced-toxicity conditioning regimen according to a new risk stratification. *Biology of blood and marrow transplantation : journal of the American Society for Blood and Marrow Transplantation*. 2014;20:2066-2071.
8. Bernardo ME, Piras E, Vacca A, et al. Allogeneic hematopoietic stem cell transplantation in thalassemia major: results of a reduced-toxicity conditioning regimen based on the use of treosulfan. *Blood*. 2012;120:473-476.
9. Ghavamzadeh A, Iravani M, Ashouri A, et al. Peripheral blood versus bone marrow as a source of hematopoietic stem cells for allogeneic transplantation in children with class I and II beta thalassemia major. *Biology of blood and marrow transplantation : journal of the American Society for Blood and Marrow Transplantation*. 2008;14:301-308.
10. Hamidieh AA, Saber T, Fayyazi S, et al. Impact of beta-globin mutations on outcome of matched related donor hematopoietic stem cell transplantation for patients with beta-thalassemia major. *Biology of blood and marrow transplantation : journal of the American Society for Blood and Marrow Transplantation*. 2014;20:1772-1776.
11. Hussein AA, Al-Zaben A, Ghatasheh L, et al. Risk adopted allogeneic hematopoietic stem cell transplantation using a reduced intensity regimen for children with thalassemia major. *Pediatr Blood Cancer*. 2013;60:1345-1349.
12. Shah SA, Shah KM, Patel KA, et al. Unrelated Umbilical Cord Blood Transplant for Children with beta-Thalassemia Major. *Indian J Hematol Blood Transfus*. 2015;31:9-13.
13. Sruamsiri R, Chaiyakunapruk N, Pakakasama S, et al. Cost utility analysis of reduced intensity hematopoietic stem cell transplantation in adolescence and young adult with severe thalassemia compared to hypertransfusion and iron chelation program. *BMC Health Serv Res*. 2013;13:45.

14. Gaziev J, Marziali M, Isgro A, et al. Bone marrow transplantation for thalassemia from alternative related donors: improved outcomes with a new approach. *Blood*. 2013;122:2751-2756.
15. Gaziev J, Sodani P, Polchi P, Andreani M, Lucarelli G. Bone marrow transplantation in adults with thalassemia: Treatment and long-term follow-up. *Ann N Y Acad Sci*. 2005;1054:196-205.
16. Sodani P, Gaziev D, Polchi P, et al. New approach for bone marrow transplantation in patients with class 3 thalassemia aged younger than 17 years. *Blood*. 2004;104:1201-1203.
17. Gaziev D, Galimberti M, Lucarelli G, et al. Bone marrow transplantation from alternative donors for thalassemia: HLA-phenotypically identical relative and HLA-nonidentical sibling or parent transplants. *Bone marrow transplantation*. 2000;25:815-821.
18. Li C, Wu X, Feng X, et al. A novel conditioning regimen improves outcomes in beta-thalassemia major patients using unrelated donor peripheral blood stem cell transplantation. *Blood*. 2012;120:3875-3881.

## Fanconi anemia, dyskeratosis congenita, Diamond Blackfan anemia and other inherited bone marrow failure syndromes

1. Ratko TA, Belinson SE, Brown HM, et al. Hematopoietic Stem-Cell Transplantation in the Pediatric Population. Comparative Effectiveness Review No. 48. (Prepared by the Blue Cross and Blue Shield Association Technology Evaluation Center Evidence-based Practice Center under Contract No. HHS 290-2007-10058.) AHRQ Publication No. 12-EHC018-EF. Rockville, MD: Agency for Healthcare Research and Quality; February 2012. Available at [www.effectivehealthcare.ahrq.gov/reports/final.cfm](http://www.effectivehealthcare.ahrq.gov/reports/final.cfm) (accessed 02/01/2015).
2. Wagner J. Hematopoietic stem cell transplantation In: Frohnmayer D, Frohnmayer L, Guinan EC, Kennedy T, Larsen K, eds. *Fanconi anemia: Guidelines for diagnosis and management*. Fourth Edition ed: Fanconi Anemia Research Fund, Inc; 2014.
3. Peffault de Latour R, Porcher R, Dalle JH, et al. Allogeneic hematopoietic stem cell transplantation in Fanconi anemia: the European Group for Blood and Marrow Transplantation experience. *Blood*. 2013;122:4279-4286.
4. Gluckman E, Rocha V, Ionescu I, et al. Results of unrelated cord blood transplant in fanconi anemia patients: risk factor analysis for engraftment and survival. *Biology of blood and marrow transplantation : journal of the American Society for Blood and Marrow Transplantation*. 2007;13:1073-1082.
5. Wagner JE, Eapen M, MacMillan ML, et al. Unrelated donor bone marrow transplantation for the treatment of Fanconi anemia. *Blood*. 2007;109:2256-2262.
6. Farzin A, Davies SM, Smith FO, et al. Matched sibling donor haematopoietic stem cell transplantation in Fanconi anaemia: an update of the Cincinnati Children's experience. *British journal of haematology*. 2007;136:633-640.
7. Stepensky P, Shapira MY, Balashov D, et al. Bone marrow transplantation for Fanconi anemia using fludarabine-based conditioning. *Biology of blood and marrow transplantation : journal of the American Society for Blood and Marrow Transplantation*. 2011;17:1282-1288.
8. Ayas M, Saber W, Davies SM, et al. Allogeneic hematopoietic cell transplantation for fanconi anemia in patients with pretransplantation cytogenetic abnormalities, myelodysplastic syndrome, or acute leukemia. *Journal of clinical oncology : official journal of the American Society of Clinical Oncology*. 2013;31:1669-1676.
9. Pasquini R, Carreras J, Pasquini MC, et al. HLA-matched sibling hematopoietic stem cell transplantation for fanconi anemia: comparison of irradiation and nonirradiation containing conditioning regimens. *Biology of blood and marrow transplantation : journal of the American Society for Blood and Marrow Transplantation*. 2008;14:1141-1147.
10. MacMillan ML, Wagner JE. Haematopoeitic cell transplantation for Fanconi anaemia - when and how? *British journal of haematology*. 2010;149:14-21.
11. MacMillan ML, DeFor TE, Young JA, et al. Alternative donor hematopoietic cell transplantation for Fanconi anemia. *Blood*. 2015;125:3798-3804.
12. Mitchell R, Wagner JE, Hirsch B, DeFor TE, Zierhut H, MacMillan ML. Haematopoietic cell transplantation for acute leukaemia and advanced myelodysplastic syndrome in Fanconi anaemia. *British journal of haematology*. 2014;164:384-395.
13. Fagioli F, Quarello P, Zecca M, et al. Haematopoietic stem cell transplantation for Diamond Blackfan anaemia: a report from the Italian Association of Paediatric Haematology and Oncology Registry. *British journal of haematology*. 2014;165:673-681.
14. Mugishima H, Ohga S, Ohara A, et al. Hematopoietic stem cell transplantation for Diamond-Blackfan anemia: a report from the Aplastic Anemia Committee of the Japanese Society of Pediatric Hematology. *Pediatr Transplant*. 2007;11:601-607.

15. Ohga S, Mugishima H, Ohara A, et al. Diamond-Blackfan anemia in Japan: clinical outcomes of prednisolone therapy and hematopoietic stem cell transplantation. *Int J Hematol.* 2004;79:22-30.
16. Roy V, Perez WS, Eapen M, et al. Bone marrow transplantation for diamond-blackfan anemia. *Biology of blood and marrow transplantation : journal of the American Society for Blood and Marrow Transplantation.* 2005;11:600-608.
17. Algeri M, Comoli P, Strocchio L, et al. Successful T-cell-depleted Haploidentical Hematopoietic Stem Cell Transplantation in a Child With Dyskeratosis Congenita After a Fludarabine-based Conditioning Regimen. *J Pediatr Hematol Oncol.* 2015;37:322-326.
18. Ayas M, Nassar A, Hamidieh AA, et al. Reduced intensity conditioning is effective for hematopoietic SCT in dyskeratosis congenita-related BM failure. *Bone marrow transplantation.* 2013;48:1168-1172.
19. Dietz AC, Orchard PJ, Baker KS, et al. Disease-specific hematopoietic cell transplantation: nonmyeloablative conditioning regimen for dyskeratosis congenita. *Bone marrow transplantation.* 2011;46:98-104.
20. Gadalla SM, Sales-Bonfim C, Carreras J, et al. Outcomes of allogeneic hematopoietic cell transplantation in patients with dyskeratosis congenita. *Biology of blood and marrow transplantation : journal of the American Society for Blood and Marrow Transplantation.* 2013;19:1238-1243.
21. Nishio N, Takahashi Y, Ohashi H, et al. Reduced-intensity conditioning for alternative donor hematopoietic stem cell transplantation in patients with dyskeratosis congenita. *Pediatr Transplant.* 2011;15:161-166.
22. Al-Ahmari A, Ayas M, Al-Jefri A, Al-Mahr M, Rifai S, El-Solh H. Allogeneic stem cell transplantation for patients with congenital amegakaryocytic thrombocytopenia (CAT). *Bone marrow transplantation.* 2004;33:829-831.
23. Lackner A, Basu O, Bierings M, et al. Haematopoietic stem cell transplantation for amegakaryocytic thrombocytopenia. *British journal of haematology.* 2000;109:773-775.

## Severe congenital neutropenia, chronic granulomatous disease and other phagocytic cell disorders

1. Carlsson G, Winiarski J, Ljungman P, et al. Hematopoietic stem cell transplantation in severe congenital neutropenia. *Pediatr Blood Cancer*. 2011;56:444-451.
2. Oshima K, Hanada R, Kobayashi R, et al. Hematopoietic stem cell transplantation in patients with severe congenital neutropenia: an analysis of 18 Japanese cases. *Pediatr Transplant*. 2010;14:657-663.
3. Elhasid R, Rowe JM. Hematopoietic stem cell transplantation in neutrophil disorders: severe congenital neutropenia, leukocyte adhesion deficiency and chronic granulomatous disease. *Clin Rev Allergy Immunol*. 2010;38:61-67.
4. Choi SW, Boxer LA, Pulsipher MA, et al. Stem cell transplantation in patients with severe congenital neutropenia with evidence of leukemic transformation. *Bone marrow transplantation*. 2005;35:473-477.
5. Ferry C, Ouachee M, Leblanc T, et al. Hematopoietic stem cell transplantation in severe congenital neutropenia: experience of the French SCN register. *Bone marrow transplantation*. 2005;35:45-50.
6. Zeidler C, Welte K, Barak Y, et al. Stem cell transplantation in patients with severe congenital neutropenia without evidence of leukemic transformation. *Blood*. 2000;95:1195-1198.
7. Cole T, McKendrick F, Titman P, et al. Health related quality of life and emotional health in children with chronic granulomatous disease: a comparison of those managed conservatively with those that have undergone haematopoietic stem cell transplant. *J Clin Immunol*. 2013;33:8-13.
8. Del Giudice I, Iori AP, Mengarelli A, et al. Allogeneic stem cell transplant from HLA-identical sibling for chronic granulomatous disease and review of the literature. *Ann Hematol*. 2003;82:189-192.
9. Oshrine B, Morsheimer M, Heimall J, Bunin N. Reduced-intensity conditioning for hematopoietic cell transplantation of chronic granulomatous disease. *Pediatr Blood Cancer*. 2014.
10. Gungor T, Teira P, Slatter M, et al. Reduced-intensity conditioning and HLA-matched haematopoietic stem-cell transplantation in patients with chronic granulomatous disease: a prospective multicentre study. *Lancet*. 2014;383:436-448.
11. Ahlin A, Fugelang J, de Boer M, Ringden O, Fasth A, Winiarski J. Chronic granulomatous disease-haematopoietic stem cell transplantation versus conventional treatment. *Acta Paediatr*. 2013;102:1087-1094.
12. Cole T, Pearce MS, Cant AJ, Cale CM, Goldblatt D, Gennery AR. Clinical outcome in children with chronic granulomatous disease managed conservatively or with hematopoietic stem cell transplantation. *J Allergy Clin Immunol*. 2013;132:1150-1155.
13. Tewari P, Martin PL, Mendizabal A, et al. Myeloablative transplantation using either cord blood or bone marrow leads to immune recovery, high long-term donor chimerism and excellent survival in chronic granulomatous disease. *Biology of blood and marrow transplantation : journal of the American Society for Blood and Marrow Transplantation*. 2012;18:1368-1377.
14. Martinez CA, Shah S, Shearer WT, et al. Excellent survival after sibling or unrelated donor stem cell transplantation for chronic granulomatous disease. *J Allergy Clin Immunol*. 2012;129:176-183.
15. Gozdzik J, Pituch-Noworolska A, Skoczen S, et al. Allogeneic haematopoietic stem cell transplantation as therapy for chronic granulomatous disease--single centre experience. *J Clin Immunol*. 2011;31:332-337.

16. Soncini E, Slatter MA, Jones LB, et al. Unrelated donor and HLA-identical sibling haematopoietic stem cell transplantation cure chronic granulomatous disease with good long-term outcome and growth. *British journal of haematology*. 2009;145:73-83.
17. Schuetz C, Hoenig M, Gatz S, et al. Hematopoietic stem cell transplantation from matched unrelated donors in chronic granulomatous disease. *Immunol Res*. 2009;44:35-41.
18. Pasic S, Minic A, Minic P, et al. Long-term follow-up and prognosis of chronic granulomatous disease in Yugoslavia: is there a role for early bone marrow transplantation? *J Clin Immunol*. 2003;23:55-61.
19. Bhatla D, Davies SM, Shenoy S, et al. Reduced-intensity conditioning is effective and safe for transplantation of patients with Shwachman-Diamond syndrome. *Bone marrow transplantation*. 2008;42:159-165.
20. Cesaro S, Oneto R, Messina C, et al. Haematopoietic stem cell transplantation for Shwachman-Diamond disease: a study from the European Group for blood and marrow transplantation. *British journal of haematology*. 2005;131:231-236.
21. Donadieu J, Michel G, Merlin E, et al. Hematopoietic stem cell transplantation for Shwachman-Diamond syndrome: experience of the French neutropenia registry. *Bone marrow transplantation*. 2005;36:787-792.
22. Vibhakar R, Radhi M, Rumelhart S, Tatman D, Goldman F. Successful unrelated umbilical cord blood transplantation in children with Shwachman-Diamond syndrome. *Bone marrow transplantation*. 2005;36:855-861.
23. Wynn RF, Sood M, Theilgaard-Monch K, et al. Intractable diarrhoea of infancy caused by neutrophil specific granule deficiency and cured by stem cell transplantation. *Gut*. 2006;55:292-293.
24. Baumeister FA, Stachel D, Schuster F, et al. Accelerated phase in partial albinism with immunodeficiency (Griscelli syndrome): genetics and stem cell transplantation in a 2-month-old girl. *European journal of pediatrics*. 2000;159:74-78.

## Hemophagocytic disorders

1. Marsh RA, Rao MB, Gefen A, et al. Experience with Alemtuzumab, Fludarabine, and Melphalan Reduced-Intensity Conditioning Hematopoietic Cell Transplantation in Patients with Nonmalignant Diseases Reveals Good Outcomes and Risk of Mixed Chimerism Depends on Underlying Disease, Stem Cell Source, and Alemtuzumab Regimen. *Biology of blood and marrow transplantation : journal of the American Society for Blood and Marrow Transplantation*. 2015.
2. Hamidieh AA, Pourpak Z, Hashemi S, et al. Fludarabine-based reduced-intensity conditioning regimen for hematopoietic stem cell transplantation in primary hemophagocytic lymphohistiocytosis. *European journal of haematology*. 2014;92:331-336.
3. Marsh RA, Kim MO, Liu C, et al. An intermediate alemtuzumab schedule reduces the incidence of mixed chimerism following reduced-intensity conditioning hematopoietic cell transplantation for hemophagocytic lymphohistiocytosis. *Biology of blood and marrow transplantation : journal of the American Society for Blood and Marrow Transplantation*. 2013;19:1625-1631.
4. Sawada A, Ohga S, Ishii E, et al. Feasibility of reduced-intensity conditioning followed by unrelated cord blood transplantation for primary hemophagocytic lymphohistiocytosis: a nationwide retrospective analysis in Japan. *Int J Hematol*. 2013;98:223-230.
5. Nishi M, Nishimura R, Suzuki N, et al. Reduced-intensity conditioning in unrelated donor cord blood transplantation for familial hemophagocytic lymphohistiocytosis. *Am J Hematol*. 2012;87:637-639.
6. Marsh RA, Vaughn G, Kim MO, et al. Reduced-intensity conditioning significantly improves survival of patients with hemophagocytic lymphohistiocytosis undergoing allogeneic hematopoietic cell transplantation. *Blood*. 2010;116:5824-5831.
7. Yoon HS, Im HJ, Moon HN, et al. The outcome of hematopoietic stem cell transplantation in Korean children with hemophagocytic lymphohistiocytosis. *Pediatr Transplant*. 2010;14:735-740.
8. Ohga S, Kudo K, Ishii E, et al. Hematopoietic stem cell transplantation for familial hemophagocytic lymphohistiocytosis and Epstein-Barr virus-associated hemophagocytic lymphohistiocytosis in Japan. *Pediatr Blood Cancer*. 2010;54:299-306.
9. Sparber-Sauer M, Honig M, Schulz AS, et al. Patients with early relapse of primary hemophagocytic syndromes or with persistent CNS involvement may benefit from immediate hematopoietic stem cell transplantation. *Bone marrow transplantation*. 2009;44:333-338.
10. Cesaro S, Locatelli F, Lanino E, et al. Hematopoietic stem cell transplantation for hemophagocytic lymphohistiocytosis: a retrospective analysis of data from the Italian Association of Pediatric Hematology Oncology (AIEOP). *Haematologica*. 2008;93:1694-1701.
11. Baker KS, Filipovich AH, Gross TG, et al. Unrelated donor hematopoietic cell transplantation for hemophagocytic lymphohistiocytosis. *Bone marrow transplantation*. 2008;42:175-180.
12. Ouachee-Chardin M, Elie C, de Saint Basile G, et al. Hematopoietic stem cell transplantation in hemophagocytic lymphohistiocytosis: a single-center report of 48 patients. *Pediatrics*. 2006;117:e743-750.
13. Cooper N, Rao K, Gilmour K, et al. Stem cell transplantation with reduced-intensity conditioning for hemophagocytic lymphohistiocytosis. *Blood*. 2006;107:1233-1236.
14. Henter JI, Samuelsson-Horne A, Arico M, et al. Treatment of hemophagocytic lymphohistiocytosis with HLH-94 immunochemotherapy and bone marrow transplantation. *Blood*. 2002;100:2367-2373.

15. Eapen M, DeLaat CA, Baker KS, et al. Hematopoietic cell transplantation for Chediak-Higashi syndrome. *Bone marrow transplantation*. 2007;39:411-415.
16. Tardieu M, Lacroix C, Neven B, et al. Progressive neurologic dysfunctions 20 years after allogeneic bone marrow transplantation for Chediak-Higashi syndrome. *Blood*. 2005;106:40-42.

## Adrenoleukodystrophy, Karabbe's disease and related disorders

1. Mahmood A, Raymond GV, Dubey P, Peters C, Moser HW. Survival analysis of haematopoietic cell transplantation for childhood cerebral X-linked adrenoleukodystrophy: a comparison study. *The Lancet. Neurology*. 2007;6:687-692.
2. Beam D, Poe MD, Provenzale JM, et al. Outcomes of unrelated umbilical cord blood transplantation for X-linked adrenoleukodystrophy. *Biology of blood and marrow transplantation : journal of the American Society for Blood and Marrow Transplantation*. 2007;13:665-674.
3. Baumann M, Korenke GC, Weddige-Diedrichs A, et al. Haematopoietic stem cell transplantation in 12 patients with cerebral X-linked adrenoleukodystrophy. *European journal of pediatrics*. 2003;162:6-14.
4. Peters C, Charnas LR, Tan Y, et al. Cerebral X-linked adrenoleukodystrophy: the international hematopoietic cell transplantation experience from 1982 to 1999. *Blood*. 2004;104:881-888.
5. Shapiro E, Krivit W, Lockman L, et al. Long-term effect of bone-marrow transplantation for childhood-onset cerebral X-linked adrenoleukodystrophy. *Lancet*. 2000;356:713-718.
6. Escolar ML, Poe MD, Martin HR, Kurtzberg J. A staging system for infantile Krabbe disease to predict outcome after unrelated umbilical cord blood transplantation. *Pediatrics*. 2006;118:e879-889.
7. Lim ZY, Ho AY, Abrahams S, et al. Sustained neurological improvement following reduced-intensity conditioning allogeneic haematopoietic stem cell transplantation for late-onset Krabbe disease. *Bone marrow transplantation*. 2008;41:831-832.
8. Sharp ME, Laule C, Nantel S, et al. Stem cell transplantation for adult-onset krabbe disease: report of a case. *JIMD Rep*. 2013;10:57-59.
9. Siddiqi ZA, Sanders DB, Massey JM. Peripheral neuropathy in Krabbe disease: effect of hematopoietic stem cell transplantation. *Neurology*. 2006;67:268-272.
10. Yagasaki H, Kato M, Ishige M, Shichino H, Chin M, Mugishima H. Successful cord blood transplantation in a 42-day-old boy with infantile Krabbe disease. *Int J Hematol*. 2011;93:566-568.
11. Yagi T, Matsuda J, Tominaga K, Suzuki K, Suzuki K. Hematopoietic cell transplantation ameliorates clinical phenotype and progression of the CNS pathology in the mouse model of late onset Krabbe disease. *J Neuropathol Exp Neurol*. 2005;64:565-575.
12. Martin HR, Poe MD, Provenzale JM, Kurtzberg J, Mendizabal A, Escolar ML. Neurodevelopmental outcomes of umbilical cord blood transplantation in metachromatic leukodystrophy. *Biology of blood and marrow transplantation : journal of the American Society for Blood and Marrow Transplantation*. 2013;19:616-624.
13. Ding XQ, Bley A, Kohlschutter A, Fiehler J, Lanfermann H. Long-term neuroimaging follow-up on an asymptomatic juvenile metachromatic leukodystrophy patient after hematopoietic stem cell transplantation: evidence of myelin recovery and ongoing brain maturation. *Am J Med Genet A*. 2012;158A:257-260.
14. Miyake N, Miyake K, Karlsson S, Shimada T. Successful treatment of metachromatic leukodystrophy using bone marrow transplantation of HoxB4 overexpressing cells. *Mol Ther*. 2010;18:1373-1378.
15. Pierson TM, Bonnemann CG, Finkel RS, Bunin N, Tennekoon GI. Umbilical cord blood transplantation for juvenile metachromatic leukodystrophy. *Ann Neurol*. 2008;64:583-587.
16. Meuleman N, Vanhaelen G, Tondreau T, et al. Reduced intensity conditioning haematopoietic stem cell transplantation with mesenchymal stromal cells infusion for the treatment of metachromatic leukodystrophy: a case report. *Haematologica*. 2008;93:e11-13.

17. Gorg M, Wilck W, Granitzny B, et al. Stabilization of juvenile metachromatic leukodystrophy after bone marrow transplantation: a 13-year follow-up. *J Child Neurol.* 2007;22:1139-1142.
18. Miller WP, Rothman SM, Nascene D, et al. Outcomes after allogeneic hematopoietic cell transplantation for childhood cerebral adrenoleukodystrophy: the largest single-institution cohort report. *Blood.* 2011;118:1971-1978.
19. Polgreen LE, Chahla S, Miller W, et al. Early diagnosis of cerebral X-linked adrenoleukodystrophy in boys with Addison's disease improves survival and neurological outcomes. *European journal of pediatrics.* 2011;170:1049-1054.

## Inborn errors

1. Boelens JJ, Orchard PJ, Wynn RF. Transplantation in inborn errors of metabolism: current considerations and future perspectives. *British journal of haematology*. 2014;167:293-303.
2. Aldenhoven M, Wynn RF, Orchard PJ, et al. Long-term outcome of Hurler syndrome patients after hematopoietic cell transplantation: an international multicenter study. *Blood*. 2015;125:2164-2172.
3. Coletti HY, Aldenhoven M, Yelin K, Poe MD, Kurtzberg J, Escolar ML. Long-term functional outcomes of children with hurler syndrome treated with unrelated umbilical cord blood transplantation. *JIMD Rep*. 2015;20:77-86.
4. Boelens JJ, Aldenhoven M, Purtill D, et al. Outcomes of transplantation using various hematopoietic cell sources in children with Hurler syndrome after myeloablative conditioning. *Blood*. 2013;121:3981-3987.
5. Grigull L, Sykora KW, Tenger A, et al. Variable disease progression after successful stem cell transplantation: prospective follow-up investigations in eight patients with Hurler syndrome. *Pediatr Transplant*. 2011;15:861-869.
6. Boelens JJ, Rocha V, Aldenhoven M, et al. Risk factor analysis of outcomes after unrelated cord blood transplantation in patients with hurler syndrome. *Biology of blood and marrow transplantation : journal of the American Society for Blood and Marrow Transplantation*. 2009;15:618-625.
7. Malm G, Gustafsson B, Berglund G, et al. Outcome in six children with mucopolysaccharidosis type IH, Hurler syndrome, after haematopoietic stem cell transplantation (HSCT). *Acta Paediatr*. 2008;97:1108-1112.
8. Polgreen LE, Tolar J, Plog M, et al. Growth and endocrine function in patients with Hurler syndrome after hematopoietic stem cell transplantation. *Bone marrow transplantation*. 2008;41:1005-1011.
9. Tolar J, Grewal SS, Bjoraker KJ, et al. Combination of enzyme replacement and hematopoietic stem cell transplantation as therapy for Hurler syndrome. *Bone marrow transplantation*. 2008;41:531-535.
10. Dusing SC, Thorpe DE, Poe MD, Rosenberg AE, Mercer VS, Escolar ML. Gross motor development of children with hurler syndrome after umbilical cord blood transplantation. *Phys Ther*. 2007;87:1433-1440.
11. Bjoraker KJ, Delaney K, Peters C, Krivit W, Shapiro EG. Long-term outcomes of adaptive functions for children with mucopolysaccharidosis I (Hurler syndrome) treated with hematopoietic stem cell transplantation. *J Dev Behav Pediatr*. 2006;27:290-296.
12. Cox-Brinkman J, Boelens JJ, Wraith JE, et al. Haematopoietic cell transplantation (HCT) in combination with enzyme replacement therapy (ERT) in patients with Hurler syndrome. *Bone marrow transplantation*. 2006;38:17-21.
13. Grigull L, Beilken A, Schrappe M, et al. Transplantation of allogeneic CD34-selected stem cells after fludarabine-based conditioning regimen for children with mucopolysaccharidosis 1H (M. Hurler). *Bone marrow transplantation*. 2005;35:265-269.
14. Grewal SS, Krivit W, Defor TE, et al. Outcome of second hematopoietic cell transplantation in Hurler syndrome. *Bone marrow transplantation*. 2002;29:491-496.
15. Hansen MD, Filipovich AH, Davies SM, et al. Allogeneic hematopoietic cell transplantation (HCT) in Hurler's syndrome using a reduced intensity preparative regimen. *Bone marrow transplantation*. 2008;41:349-353.
16. Boelens JJ, Wynn RF, O'Meara A, et al. Outcomes of hematopoietic stem cell transplantation for Hurler's syndrome in Europe: a risk factor analysis for graft failure. *Bone marrow transplantation*. 2007;40:225-233.

17. Danielsen ER, Lund AM, Thomsen C. Cerebral Magnetic Resonance Spectroscopy Demonstrates Long-Term Effect of Bone Marrow Transplantation in alpha-Mannosidosis. *JIMD Rep.* 2013;11:49-52.
18. Yesilipek AM, Akcan M, Karasu G, Uygun V, Kupesiz A, Hazar V. Successful unrelated bone marrow transplantation in two siblings with alpha-mannosidosis. *Pediatr Transplant.* 2012;16:779-782.
19. Broomfield AA, Chakrapani A, Wraith JE. The effects of early and late bone marrow transplantation in siblings with alpha-mannosidosis. Is early haematopoietic cell transplantation the preferred treatment option? *J Inherit Metab Dis.* 2010;33 Suppl 3:S123-127.
20. Mynarek M, Tolar J, Albert MH, et al. Allogeneic hematopoietic SCT for alpha-mannosidosis: an analysis of 17 patients. *Bone marrow transplantation.* 2012;47:352-359.
21. Grewal SS, Shapiro EG, Krivit W, et al. Effective treatment of alpha-mannosidosis by allogeneic hematopoietic stem cell transplantation. *J Pediatr.* 2004;144:569-573.
22. Albert MH, Schuster F, Peters C, et al. T-cell-depleted peripheral blood stem cell transplantation for alpha-mannosidosis. *Bone marrow transplantation.* 2003;32:443-446.
23. Tolar J, Petryk A, Khan K, et al. Long-term metabolic, endocrine, and neuropsychological outcome of hematopoietic cell transplantation for Wolman disease. *Bone marrow transplantation.* 2009;43:21-27.
24. Stein J, Garty BZ, Dror Y, Fenig E, Zeigler M, Yaniv I. Successful treatment of Wolman disease by unrelated umbilical cord blood transplantation. *European journal of pediatrics.* 2007;166:663-666.
25. Krivit W, Peters C, Dusenbery K, et al. Wolman disease successfully treated by bone marrow transplantation. *Bone marrow transplantation.* 2000;26:567-570.
26. de Ru MH, Boelens JJ, Das AM, et al. Enzyme replacement therapy and/or hematopoietic stem cell transplantation at diagnosis in patients with mucopolysaccharidosis type I: results of a European consensus procedure. *Orphanet J Rare Dis.* 2011;6:55.
27. Aldenhoven M, Jones SA, Bonney D, et al. Hematopoietic cell transplantation for mucopolysaccharidosis patients is safe and effective: results after implementation of international guidelines. *Biology of blood and marrow transplantation : journal of the American Society for Blood and Marrow Transplantation.* 2015;21:1106-1109.
28. Annibaldi R, Caponi L, Morganti A, Manna M, Gabrielli O, Ficcadenti A. Hunter syndrome (Mucopolysaccharidosis type II), severe phenotype: long term follow-up on patients undergone to hematopoietic stem cell transplantation. *Minerva Pediatr.* 2013;65:487-496.
29. Tanaka A, Okuyama T, Suzuki Y, et al. Long-term efficacy of hematopoietic stem cell transplantation on brain involvement in patients with mucopolysaccharidosis type II: a nationwide survey in Japan. *Mol Genet Metab.* 2012;107:513-520.
30. Turbeville S, Nicely H, Rizzo JD, et al. Clinical outcomes following hematopoietic stem cell transplantation for the treatment of mucopolysaccharidosis VI. *Mol Genet Metab.* 2011;102:111-115.
31. Lee V, Li CK, Shing MM, et al. Umbilical cord blood transplantation for Maroteaux-Lamy syndrome (mucopolysaccharidosis type VI). *Bone marrow transplantation.* 2000;26:455-458.
32. Sammarco C, Weil M, Just C, et al. Effects of bone marrow transplantation on the cardiovascular abnormalities in canine mucopolysaccharidosis VII. *Bone marrow transplantation.* 2000;25:1289-1297.
33. Peters C, Krivit W. Hematopoietic cell transplantation for mucopolysaccharidosis IIB (Hunter syndrome). *Bone marrow transplantation.* 2000;25:1097-1099.

34. Mullen CA, Thompson JN, Richard LA, Chan KW. Unrelated umbilical cord blood transplantation in infancy for mucopolysaccharidosis type IIB (Hunter syndrome) complicated by autoimmune hemolytic anemia. *Bone marrow transplantation*. 2000;25:1093-1097.
35. Schneiderman J, Thormann K, Charrow J, Kletzel M. Correction of enzyme levels with allogeneic hematopoietic progenitor cell transplantation in Niemann-Pick type B. *Pediatr Blood Cancer*. 2007;49:987-989.
36. Shah AJ, Kapoor N, Crooks GM, et al. Successful hematopoietic stem cell transplantation for Niemann-Pick disease type B. *Pediatrics*. 2005;116:1022-1025.
37. Victor S, Coulter JB, Besley GT, et al. Niemann-Pick disease: sixteen-year follow-up of allogeneic bone marrow transplantation in a type B variant. *J Inherit Metab Dis*. 2003;26:775-785.

## Primary immunodeficiency disorders, Wiskott Aldrich syndrome, severe combined immunodeficiency and its variants

1. Mitchell R, Nivison-Smith I, Anazodo A, et al. Outcomes of hematopoietic stem cell transplantation in primary immunodeficiency: a report from the Australian and New Zealand Children's Haematology Oncology Group and the Australasian Bone Marrow Transplant Recipient Registry. *Biology of blood and marrow transplantation : journal of the American Society for Blood and Marrow Transplantation*. 2013;19:338-343.
2. Slatter MA, Bhattacharya A, Abinun M, Flood TJ, Cant AJ, Gennery AR. Outcome of boost haemopoietic stem cell transplant for decreased donor chimerism or graft dysfunction in primary immunodeficiency. *Bone marrow transplantation*. 2005;35:683-689.
3. Scarselli A, Di Cesare S, Capponi C, et al. Longitudinal Evaluation of Immune Reconstitution and B-cell Function After Hematopoietic Cell Transplantation for Primary Immunodeficiency. *J Clin Immunol*. 2015.
4. Pai SY, Cowan MJ. Stem cell transplantation for primary immunodeficiency diseases: the North American experience. *Curr Opin Allergy Clin Immunol*. 2014;14:521-526.
5. Chang TY, Jaing TH, Lee WI, Chen SH, Yang CP, Hung IJ. Single-institution Experience of Unrelated Cord Blood Transplantation for Primary Immunodeficiency. *J Pediatr Hematol Oncol*. 2014.
6. Valotti M, Sottini A, Lanfranchi A, et al. Long-lasting production of new T and B cells and T-cell repertoire diversity in patients with primary immunodeficiency who had undergone stem cell transplantation: a single-centre experience. *J Immunol Res*. 2014;2014:240453.
7. Wahadneh AM, Bin Dahman HA, Abu Shukear ME, et al. Mismatched related hematopoietic stem cell transplantation in primary immunodeficiency. *Saudi J Kidney Dis Transpl*. 2013;24:1137-1143.
8. Amayiri N, Al-Zaben A, Ghatasheh L, Frangoul H, Hussein AA. Hematopoietic stem cell transplantation for children with primary immunodeficiency diseases: single center experience in Jordan. *Pediatr Transplant*. 2013;17:394-402.
9. Lee AJ, Wu J, Villegas MS, Shek LP, Lee BW, Tan PL. Stem cell transplantation for primary immunodeficiency disease: experience of a singapore hospital. *World Allergy Organ J*. 2012;5:41-44.
10. Eapen M, Ahn KW, Orchard PJ, et al. Long-term survival and late deaths after hematopoietic cell transplantation for primary immunodeficiency diseases and inborn errors of metabolism. *Biology of blood and marrow transplantation : journal of the American Society for Blood and Marrow Transplantation*. 2012;18:1438-1445.
11. Morio T, Atsuta Y, Tomizawa D, et al. Outcome of unrelated umbilical cord blood transplantation in 88 patients with primary immunodeficiency in Japan. *British journal of haematology*. 2011;154:363-372.
12. Slatter MA, Rao K, Amrolia P, et al. Treosulfan-based conditioning regimens for hematopoietic stem cell transplantation in children with primary immunodeficiency: United Kingdom experience. *Blood*. 2011;117:4367-4375.
13. Petrovic A, Dorsey M, Miotke J, Shepherd C, Day N. Hematopoietic stem cell transplantation for pediatric patients with primary immunodeficiency diseases at All Children's Hospital/University of South Florida. *Immunol Res*. 2009;44:169-178.
14. Diaz de Heredia C, Ortega JJ, Diaz MA, et al. Unrelated cord blood transplantation for severe combined immunodeficiency and other primary immunodeficiencies. *Bone marrow transplantation*. 2008;41:627-633.
15. Sato T, Kobayashi R, Toita N, et al. Stem cell transplantation in primary immunodeficiency disease patients. *Pediatr Int*. 2007;49:795-800.

16. Burroughs LM, Storb R, Leisenring WM, et al. Intensive postgrafting immune suppression combined with nonmyeloablative conditioning for transplantation of HLA-identical hematopoietic cell grafts: results of a pilot study for treatment of primary immunodeficiency disorders. *Bone marrow transplantation*. 2007;40:633-642.
17. Tsuji Y, Imai K, Kajiwara M, et al. Hematopoietic stem cell transplantation for 30 patients with primary immunodeficiency diseases: 20 years experience of a single team. *Bone marrow transplantation*. 2006;37:469-477.
18. Bhattacharya A, Slatter MA, Chapman CE, et al. Single centre experience of umbilical cord stem cell transplantation for primary immunodeficiency. *Bone marrow transplantation*. 2005;36:295-299.
19. Yang YL, Lu MY, Jou ST, Lin KH, Lin DT. Hematopoietic stem cell transplantation in Taiwanese children with primary immunodeficiency. *J Formos Med Assoc*. 2005;104:101-106.
20. Rao K, Amrolia PJ, Jones A, et al. Improved survival after unrelated donor bone marrow transplantation in children with primary immunodeficiency using a reduced-intensity conditioning regimen. *Blood*. 2005;105:879-885.
21. Gaspar HB, Qasim W, Davies EG, Rao K, Amrolia PJ, Veys P. How I treat severe combined immunodeficiency. *Blood*. 2013;122:3749-3758.
22. Lanfranchi A, Verardi R, Tettoni K, et al. Haploidentical peripheral blood and marrow stem cell transplantation in nine cases of primary immunodeficiency. *Haematologica*. 2000;85:41-46.
23. Horino S, Sasahara Y, Sato M, et al. Selective expansion of donor-derived regulatory T cells after allogeneic bone marrow transplantation in a patient with IPEX syndrome. *Pediatr Transplant*. 2014;18:E25-30.
24. Seidel MG, Fritsch G, Lion T, et al. Selective engraftment of donor CD4+25high FOXP3-positive T cells in IPEX syndrome after nonmyeloablative hematopoietic stem cell transplantation. *Blood*. 2009;113:5689-5691.
25. Dorsey MJ, Petrovic A, Morrow MR, Dishaw LJ, Sleasman JW. FOXP3 expression following bone marrow transplantation for IPEX syndrome after reduced-intensity conditioning. *Immunol Res*. 2009;44:179-184.
26. Zhan H, Sinclair J, Adams S, et al. Immune reconstitution and recovery of FOXP3 (forkhead box P3)-expressing T cells after transplantation for IPEX (immune dysregulation, polyendocrinopathy, enteropathy, X-linked) syndrome. *Pediatrics*. 2008;121:e998-1002.
27. Lucas KG, Ungar D, Comito M, Bayerl M, Groh B. Submyeloablative cord blood transplantation corrects clinical defects seen in IPEX syndrome. *Bone marrow transplantation*. 2007;39:55-56.
28. Rao A, Kamani N, Filipovich A, et al. Successful bone marrow transplantation for IPEX syndrome after reduced-intensity conditioning. *Blood*. 2007;109:383-385.
29. Mazzolari E, Forino C, Fontana M, et al. A new case of IPEX receiving bone marrow transplantation. *Bone marrow transplantation*. 2005;35:1033-1034.
30. Baud O, Goulet O, Canioni D, et al. Treatment of the immune dysregulation, polyendocrinopathy, enteropathy, X-linked syndrome (IPEX) by allogeneic bone marrow transplantation. *The New England journal of medicine*. 2001;344:1758-1762.
31. Kasow KA, Morales-Tirado VM, Wichlan D, et al. Therapeutic in vivo selection of thymic-derived natural T regulatory cells following non-myeloablative hematopoietic stem cell transplant for IPEX. *Clin Immunol*. 2011;141:169-176.
32. Wahadneh A, Bin-Dahman H, Habahbeh Z, et al. Successful second bone marrow transplantation in Omenn's syndrome after bone marrow aplasia: a case report. *Pediatr Transplant*. 2012;16:E43-48.

33. Bordon V, Gennery AR, Slatter MA, et al. Clinical and immunologic outcome of patients with cartilage hair hypoplasia after hematopoietic stem cell transplantation. *Blood*. 2010;116:27-35.
34. Guggenheim R, Somech R, Grunebaum E, Atkinson A, Roifman CM. Bone marrow transplantation for cartilage-hair-hypoplasia. *Bone marrow transplantation*. 2006;38:751-756.
35. Myers LA, Hershfield MS, Neale WT, Escolar M, Kurtzberg J. Purine nucleoside phosphorylase deficiency (PNP-def) presenting with lymphopenia and developmental delay: successful correction with umbilical cord blood transplantation. *J Pediatr*. 2004;145:710-712.
36. Classen CF, Schulz AS, Sigl-Kraetzig M, et al. Successful HLA-identical bone marrow transplantation in a patient with PNP deficiency using busulfan and fludarabine for conditioning. *Bone marrow transplantation*. 2001;28:93-96.
37. Lee YH, Lim YJ, Shin SA, et al. Phenotypic and genotypic correction of WASP gene mutation in Wiskott-Aldrich syndrome by unrelated cord blood stem cell transplantation. *J Korean Med Sci*. 2009;24:751-754.
38. Tsuji Y, Imai K, Morinishi Y, Kogawa K, Morino M, Nonoyama S. Successful unrelated cord blood transplantation for a patient with CD40 ligand deficiency. *Haematologica*. 2007;92:1727-1728.
39. Mazzolari E, Lanzi G, Forino C, et al. First report of successful stem cell transplantation in a child with CD40 deficiency. *Bone marrow transplantation*. 2007;40:279-281.
40. Gennery AR, Khawaja K, Veys P, et al. Treatment of CD40 ligand deficiency by hematopoietic stem cell transplantation: a survey of the European experience, 1993-2002. *Blood*. 2004;103:1152-1157.
41. Kutukculer N, Aksoylar S, Kansoy S, Cetingul N, Notarangelo LD. Outcome of hematopoietic stem cell transplantation in hyper-IgM syndrome caused by CD40 deficiency. *J Pediatr*. 2003;143:141-142.
42. Khawaja K, Gennery AR, Flood TJ, Abinun M, Cant AJ. Bone marrow transplantation for CD40 ligand deficiency: a single centre experience. *Arch Dis Child*. 2001;84:508-511.
43. Filipovich AH, Stone JV, Tomany SC, et al. Impact of donor type on outcome of bone marrow transplantation for Wiskott-Aldrich syndrome: collaborative study of the International Bone Marrow Transplant Registry and the National Marrow Donor Program. *Blood*. 2001;97:1598-1603.
44. Knutsen AP, Steffen M, Wassmer K, Wall DA. Umbilical cord blood transplantation in Wiskott Aldrich syndrome. *J Pediatr*. 2003;142:519-523.
45. Kobayashi R, Ariga T, Nonoyama S, et al. Outcome in patients with Wiskott-Aldrich syndrome following stem cell transplantation: an analysis of 57 patients in Japan. *British journal of haematology*. 2006;135:362-366.
46. Moratto D, Giliani S, Bonfim C, et al. Long-term outcome and lineage-specific chimerism in 194 patients with Wiskott-Aldrich syndrome treated by hematopoietic cell transplantation in the period 1980-2009: an international collaborative study. *Blood*. 2011;118:1675-1684.
47. Munoz A, Olive T, Martinez A, et al. Allogeneic hemopoietic stem cell transplantation (HSCT) for Wiskott-Aldrich syndrome: a report of the Spanish Working Party for Blood and Marrow Transplantation in Children (GETMON). *Pediatr Hematol Oncol*. 2007;24:393-402.
48. Ozsahin H, Cavazzana-Calvo M, Notarangelo LD, et al. Long-term outcome following hematopoietic stem-cell transplantation in Wiskott-Aldrich syndrome: collaborative study of the European Society for Immunodeficiencies and European Group for Blood and Marrow Transplantation. *Blood*. 2008;111:439-445.

49. Pai SY, DeMartis D, Forino C, et al. Stem cell transplantation for the Wiskott-Aldrich syndrome: a single-center experience confirms efficacy of matched unrelated donor transplantation. *Bone marrow transplantation*. 2006;38:671-679.
50. Shin CR, Kim MO, Li D, et al. Outcomes following hematopoietic cell transplantation for Wiskott-Aldrich syndrome. *Bone marrow transplantation*. 2012;47:1428-1435.
51. Stepensky P, Krauss A, Goldstein G, et al. Impact of conditioning on outcome of hematopoietic stem cell transplantation for wiskott-Aldrich syndrome. *J Pediatr Hematol Oncol*. 2013;35:e234-238.
52. Yamaguchi K, Ariga T, Yamada M, et al. Mixed chimera status of 12 patients with Wiskott-Aldrich syndrome (WAS) after hematopoietic stem cell transplantation: evaluation by flow cytometric analysis of intracellular WAS protein expression. *Blood*. 2002;100:1208-1214.

## Osteopetrosis

1. Behfar M, Dehghani SS, Hosseini AS, Jalali A, Hamidieh AA, Ghavamzadeh A. Non-total body irradiation myeloablative conditioning with intravenous busulfan and cyclophosphamide in hematopoietic stem cell transplantation for malignant infantile osteopetrosis. *Pediatr Transplant.* 2015;19:422-427.
2. Hashemi Taheri AP, Radmard AR, Kooraki S, et al. Radiologic resolution of malignant infantile osteopetrosis skeletal changes following hematopoietic stem cell transplantation. *Pediatr Blood Cancer.* 2015.
3. Tolar J, Bonfim C, Grewal S, Orchard P. Engraftment and survival following hematopoietic stem cell transplantation for osteopetrosis using a reduced intensity conditioning regimen. *Bone marrow transplantation.* 2006;38:783-787.
4. Corbacioglu S, Honig M, Lahr G, et al. Stem cell transplantation in children with infantile osteopetrosis is associated with a high incidence of VOD, which could be prevented with defibrotide. *Bone marrow transplantation.* 2006;38:547-553.
5. Steward CG, Blair A, Moppett J, et al. High peripheral blood progenitor cell counts enable autologous backup before stem cell transplantation for malignant infantile osteopetrosis. *Biology of blood and marrow transplantation : journal of the American Society for Blood and Marrow Transplantation.* 2005;11:115-121.
6. Driessen GJ, Gerritsen EJ, Fischer A, et al. Long-term outcome of haematopoietic stem cell transplantation in autosomal recessive osteopetrosis: an EBMT report. *Bone marrow transplantation.* 2003;32:657-663.
7. Schulz AS, Classen CF, Mihatsch WA, et al. HLA-haploidentical blood progenitor cell transplantation in osteopetrosis. *Blood.* 2002;99:3458-3460.
8. Orchard PJ, Fasth AL, Le Rademacher J, et al. Hematopoietic stem cell transplantation for infantile osteopetrosis. *Blood.* 2015.

## Multiple sclerosis

1. Carreras E, Saiz A, Marin P, et al. CD34+ selected autologous peripheral blood stem cell transplantation for multiple sclerosis: report of toxicity and treatment results at one year of follow-up in 15 patients. *Haematologica*. 2003;88:306-314.
2. Shevchenko JL, Kuznetsov AN, Ionova TI, et al. Long-term outcomes of autologous hematopoietic stem cell transplantation with reduced-intensity conditioning in multiple sclerosis: physician's and patient's perspectives. *Ann Hematol*. 2015.
3. Nash RA, Hutton GJ, Racke MK, et al. High-dose immunosuppressive therapy and autologous hematopoietic cell transplantation for relapsing-remitting multiple sclerosis (HALT-MS): a 3-year interim report. *JAMA Neurol*. 2015;72:159-169.
4. Mancardi GL, Sormani MP, Gualandi F, et al. Autologous hematopoietic stem cell transplantation in multiple sclerosis: a phase II trial. *Neurology*. 2015;84:981-988.
5. Curro D, Vuolo L, Gualandi F, et al. Low intensity lympho-ablative regimen followed by autologous hematopoietic stem cell transplantation in severe forms of multiple sclerosis: A MRI-based clinical study. *Mult Scler*. 2015.
6. Burt RK, Balabanov R, Han X, et al. Association of nonmyeloablative hematopoietic stem cell transplantation with neurological disability in patients with relapsing-remitting multiple sclerosis. *Jama*. 2015;313:275-284.
7. Walker LA, Berard JA, Atkins HL, Bowman M, Lee H, Freedman MS. Cognitive change and neuroimaging following immunoablative therapy and hematopoietic stem cell transplantation in multiple sclerosis: A pilot study. *Mult Scler Relat Disord*. 2014;3:129-135.
8. Burman J, Iacobaeus E, Svenningsson A, et al. Autologous haematopoietic stem cell transplantation for aggressive multiple sclerosis: the Swedish experience. *J Neurol Neurosurg Psychiatry*. 2014;85:1116-1121.
9. Shevchenko JL, Kuznetsov AN, Ionova TI, et al. Autologous hematopoietic stem cell transplantation with reduced-intensity conditioning in multiple sclerosis. *Exp Hematol*. 2012;40:892-898.
10. Saccardi R, Freedman MS, Sormani MP, et al. A prospective, randomized, controlled trial of autologous haematopoietic stem cell transplantation for aggressive multiple sclerosis: a position paper. *Mult Scler*. 2012;18:825-834.
11. Mancardi GL, Sormani MP, Di Gioia M, et al. Autologous haematopoietic stem cell transplantation with an intermediate intensity conditioning regimen in multiple sclerosis: the Italian multi-centre experience. *Mult Scler*. 2012;18:835-842.
12. Bowen JD, Kraft GH, Wundes A, et al. Autologous hematopoietic cell transplantation following high-dose immunosuppressive therapy for advanced multiple sclerosis: long-term results. *Bone marrow transplantation*. 2012;47:946-951.
13. Xu J, Ji BX, Su L, et al. Clinical outcome of autologous peripheral blood stem cell transplantation in opticospinal and conventional forms of secondary progressive multiple sclerosis in a Chinese population. *Ann Hematol*. 2011;90:343-348.
14. Krasulova E, Trneny M, Kozak T, et al. High-dose immunoablation with autologous haematopoietic stem cell transplantation in aggressive multiple sclerosis: a single centre 10-year experience. *Mult Scler*. 2010;16:685-693.
15. Burt RK, Loh Y, Cohen B, et al. Autologous non-myeloablative haemopoietic stem cell transplantation in relapsing-remitting multiple sclerosis: a phase I/II study. *The Lancet Neurology*. 2009;8:244-253.
16. Shevchenko YL, Novik AA, Kuznetsov AN, et al. High-dose immunosuppressive therapy with autologous hematopoietic stem cell transplantation as a treatment option in multiple sclerosis. *Exp Hematol*. 2008;36:922-928.

17. Saccardi R, Kozak T, Bocelli-Tyndall C, et al. Autologous stem cell transplantation for progressive multiple sclerosis: update of the European Group for Blood and Marrow Transplantation autoimmune diseases working party database. *Mult Scler.* 2006;12:814-823.
18. Ni XS, Ouyang J, Zhu WH, Wang C, Chen B. Autologous hematopoietic stem cell transplantation for progressive multiple sclerosis: report of efficacy and safety at three yr of follow up in 21 patients. *Clin Transplant.* 2006;20:485-489.
19. Nash RA, Bowen JD, McSweeney PA, et al. High-dose immunosuppressive therapy and autologous peripheral blood stem cell transplantation for severe multiple sclerosis. *Blood.* 2003;102:2364-2372.
20. Burt RK, Cohen BA, Russell E, et al. Hematopoietic stem cell transplantation for progressive multiple sclerosis: failure of a total body irradiation-based conditioning regimen to prevent disease progression in patients with high disability scores. *Blood.* 2003;102:2373-2378.

## Autoimmune diseases

1. Traynor AE, Barr WG, Rosa RM, et al. Hematopoietic stem cell transplantation for severe and refractory lupus. Analysis after five years and fifteen patients. *Arthritis Rheum.* 2002;46:2917-2923.
2. Su G, Luan Z, Wu F, et al. Long-term follow-up of autologous stem cell transplantation for severe paediatric systemic lupus erythematosus. *Clin Rheumatol.* 2013;32:1727-1734.
3. Alchi B, Jayne D, Labopin M, et al. Autologous haematopoietic stem cell transplantation for systemic lupus erythematosus: data from the European Group for Blood and Marrow Transplantation registry. *Lupus.* 2013;22:245-253.
4. Song XN, Lv HY, Sun LX, et al. Autologous stem cell transplantation for systemic lupus erythematosus: report of efficacy and safety at 7 years of follow-up in 17 patients. *Transplant Proc.* 2011;43:1924-1927.
5. Burt RK, Traynor A, Statkute L, et al. Nonmyeloablative hematopoietic stem cell transplantation for systemic lupus erythematosus. *Jama.* 2006;295:527-535.
6. Traynor AE, Corbridge TC, Eagan AE, et al. Prevalence and reversibility of pulmonary dysfunction in refractory systemic lupus: improvement correlates with disease remission following hematopoietic stem cell transplantation. *Chest.* 2005;127:1680-1689.
7. Lisukov IA, Sizikova SA, Kulagin AD, et al. High-dose immunosuppression with autologous stem cell transplantation in severe refractory systemic lupus erythematosus. *Lupus.* 2004;13:89-94.
8. Jayne D, Passweg J, Marmont A, et al. Autologous stem cell transplantation for systemic lupus erythematosus. *Lupus.* 2004;13:168-176.
9. Marmont AM, Burt RK. Hematopoietic stem cell transplantation for systemic lupus erythematosus, the antiphospholipid syndrome and bullous skin diseases. *Autoimmunity.* 2008;41:639-647.
10. Statkute L, Traynor A, Oyama Y, et al. Antiphospholipid syndrome in patients with systemic lupus erythematosus treated by autologous hematopoietic stem cell transplantation. *Blood.* 2005;106:2700-2709.
11. Verburg RJ, Flierman R, Sont JK, et al. Outcome of intensive immunosuppression and autologous stem cell transplantation in patients with severe rheumatoid arthritis is associated with the composition of synovial T cell infiltration. *Ann Rheum Dis.* 2005;64:1397-1405.
12. Verburg RJ, Sont JK, van Laar JM. Reduction of joint damage in severe rheumatoid arthritis by high-dose chemotherapy and autologous stem cell transplantation. *Arthritis Rheum.* 2005;52:421-424.
13. Snowden JA, Passweg J, Moore JJ, et al. Autologous hemopoietic stem cell transplantation in severe rheumatoid arthritis: a report from the EBMT and ABMTR. *J Rheumatol.* 2004;31:482-488.
14. Moore J, Brooks P, Milliken S, et al. A pilot randomized trial comparing CD34-selected versus unmanipulated hemopoietic stem cell transplantation for severe, refractory rheumatoid arthritis. *Arthritis Rheum.* 2002;46:2301-2309.
15. van Laar JM, Verburg RJ, Fibbe WE, Breedveld FC. Intensive immunosuppression and autologous stem cell transplantation for patients with severe rheumatoid arthritis: the Leiden experience. *J Rheumatol Suppl.* 2001;64:25-27.
16. Snowden JA, Ansari A, Sachchithanatham S, et al. Autologous stem cell transplantation in severe treatment-resistant Crohn's disease: long-term follow-up of UK patients treated on compassionate basis. *QJM.* 2014;107:871-877.

17. Cassinotti A, Annaloro C, Ardizzone S, et al. Autologous haematopoietic stem cell transplantation without CD34+ cell selection in refractory Crohn's disease. *Gut*. 2008;57:211-217.
18. Oyama Y, Craig RM, Traynor AE, et al. Autologous hematopoietic stem cell transplantation in patients with refractory Crohn's disease. *Gastroenterology*. 2005;128:552-563.
19. van Laar JM, Farge D, Sont JK, et al. Autologous hematopoietic stem cell transplantation vs intravenous pulse cyclophosphamide in diffuse cutaneous systemic sclerosis: a randomized clinical trial. *Jama*. 2014;311:2490-2498.
20. Henes JC, Schmalzing M, Vogel W, et al. Optimization of autologous stem cell transplantation for systemic sclerosis -- a single-center longterm experience in 26 patients with severe organ manifestations. *J Rheumatol*. 2012;39:269-275.
21. Burt RK, Shah SJ, Dill K, et al. Autologous non-myeloablative haemopoietic stem-cell transplantation compared with pulse cyclophosphamide once per month for systemic sclerosis (ASSIST): an open-label, randomised phase 2 trial. *Lancet*. 2011;378:498-506.
22. Oyama Y, Barr WG, Statkute L, et al. Autologous non-myeloablative hematopoietic stem cell transplantation in patients with systemic sclerosis. *Bone marrow transplantation*. 2007;40:549-555.
23. Vonk MC, Marjanovic Z, van den Hoogen FH, et al. Long-term follow-up results after autologous haematopoietic stem cell transplantation for severe systemic sclerosis. *Ann Rheum Dis*. 2008;67:98-104.
24. Nash RA, McSweeney PA, Crofford LJ, et al. High-dose immunosuppressive therapy and autologous hematopoietic cell transplantation for severe systemic sclerosis: long-term follow-up of the US multicenter pilot study. *Blood*. 2007;110:1388-1396.
25. Farge D, Passweg J, van Laar JM, et al. Autologous stem cell transplantation in the treatment of systemic sclerosis: report from the EBMT/EULAR Registry. *Ann Rheum Dis*. 2004;63:974-981.
26. Farge D, Marolleau JP, Zohar S, et al. Autologous bone marrow transplantation in the treatment of refractory systemic sclerosis: early results from a French multicentre phase I-II study. *British journal of haematology*. 2002;119:726-739.
27. Abinun M, Flood TJ, Cant AJ, et al. Autologous T cell depleted haematopoietic stem cell transplantation in children with severe juvenile idiopathic arthritis in the UK (2000-2007). *Mol Immunol*. 2009;47:46-51.
28. Brinkman DM, de Kleer IM, ten Cate R, et al. Autologous stem cell transplantation in children with severe progressive systemic or polyarticular juvenile idiopathic arthritis: long-term follow-up of a prospective clinical trial. *Arthritis Rheum*. 2007;56:2410-2421.
29. Wulffraat NM, Vastert B, Tyndall A. Treatment of refractory autoimmune diseases with autologous stem cell transplantation: focus on juvenile idiopathic arthritis. *Bone marrow transplantation*. 2005;35 Suppl 1:S27-29.
30. De Kleer IM, Brinkman DM, Ferster A, et al. Autologous stem cell transplantation for refractory juvenile idiopathic arthritis: analysis of clinical effects, mortality, and transplant related morbidity. *Ann Rheum Dis*. 2004;63:1318-1326.
31. Wulffraat NM, Brinkman D, Ferster A, et al. Long-term follow-up of autologous stem cell transplantation for refractory juvenile idiopathic arthritis. *Bone marrow transplantation*. 2003;32 Suppl 1:S61-64.
32. Mori M, Hiwatari M, Takita J, Ida K, Kawaguchi H. Successful syngeneic PBSC transplantation for a patient with refractory Evans syndrome. *Bone marrow transplantation*. 2013;48:312-313.
33. Klausegger A, Wiednig M, Urban C, et al. Successful allogeneic cord blood transplantation in a patient with Evans syndrome leads to correction of hereditary

- angioedema type I as secondary effect. *Bone marrow transplantation*. 2012;47:1259-1261.
34. Benesch M, Urban C, Platzbecker U, Passweg J. Stem cell transplantation for patients with Evans syndrome. *Expert Rev Clin Immunol*. 2009;5:341-348.
  35. Urban C, Lackner H, Sovinz P, et al. Successful unrelated cord blood transplantation in a 7-year-old boy with Evans syndrome refractory to immunosuppression and double autologous stem cell transplantation. *European journal of haematology*. 2006;76:526-530.
  36. Oyama Y, Papadopoulos EB, Miranda M, Traynor AE, Burt RK. Allogeneic stem cell transplantation for Evans syndrome. *Bone marrow transplantation*. 2001;28:903-905.
